# Supplementary material for: A membrane transporter determines the spectrum of activity of a potent platinum–acridine hybrid anticancer agent
Source: PubMed Central journal article supplement (PMC7494928; doi:10.1038/s41598-020-72099-z), 2020-09-16
Supplement: 41598_2020_72099_MOESM2_ESM.pdf [file 41598_2020_72099_MOESM2_ESM.pdf]

## **Supplementary Information**

for

### **A Membrane Transporter Determines the Spectrum of Activity of a Potent Platinum–Acridine Hybrid Anticancer Agent**

Xiyuan Yao, Noah H. Watkins, Heather Brown-Harding, and Ulrich Bierbach<sup>✉</sup>

<sup>✉</sup> [bierbau@wfu.edu](mailto:bierbau@wfu.edu)

| <b>Table of Contents</b>                                                                                                                                                                                                                                                             | <b>page</b> |
|--------------------------------------------------------------------------------------------------------------------------------------------------------------------------------------------------------------------------------------------------------------------------------------|-------------|
| <b>Table S1.</b> Summary of RNA sequences used in RNAi experiments                                                                                                                                                                                                                   | <b>S3</b>   |
| <b>Table S2.</b> Summary of antibodies used in assays                                                                                                                                                                                                                                | <b>S4</b>   |
| <b>Table S3.</b> Ten NCI-60 cell lines most sensitive to compound <b>1</b> /genetic backgrounds                                                                                                                                                                                      | <b>S5</b>   |
| <b>Figure S1.</b> Comparison of NCI-60 chemosensitivity profiles                                                                                                                                                                                                                     | <b>S6</b>   |
| <b>Table S4.</b> Results of NCI COMPARE analysis                                                                                                                                                                                                                                     | <b>S7</b>   |
| <b>Table S5.</b> NCI-60/COMPARE analysis/summary of SLC genes                                                                                                                                                                                                                        | <b>S29</b>  |
| <b>Figure S2.</b> Expression of hMATE1 ( <i>SLC47A1</i> ) in normal human tissue and in cancer cells                                                                                                                                                                                 | <b>S30</b>  |
| <b>Figure S3.</b> <i>SLC47A1</i> gene copy numbers and transcript levels in NCI-60                                                                                                                                                                                                   | <b>S31</b>  |
| <b>Table S6.</b> Summary of top 10 gene set overlaps in MSigDB for compound <b>1</b>                                                                                                                                                                                                 | <b>S32</b>  |
| <b>Figure S4.</b> Western blot analysis of A549 cell lysate for hMATE1 expression                                                                                                                                                                                                    | <b>S34</b>  |
| <b>Figure S5.</b> (A) Western blot for optimized RNAi conditions. (B) hMATE1 antibodies used in this study and aligned amino-acid sequences of the 63-kDa full-length protein and the 34-kDa splice variant (NCBI). (C,D) Results for drug uptake experiments after hMATE1 knockdown | <b>S35</b>  |
| <b>Table S7.</b> Pattern comparisons for <i>SLC47A1</i> expression in NCI CellMiner                                                                                                                                                                                                  | <b>S36</b>  |
| <b>Figure S6.</b> Correlation between CPI methylation status and expression levels of <i>SLC47A1</i>                                                                                                                                                                                 | <b>S37</b>  |
| <b>Table S8.</b> Summary of significant ( $p < 0.05$ ) correlations identified between CPI methylation status and expression levels of the <i>SLC47A1</i> gene                                                                                                                       | <b>S38</b>  |
| <b>Table S9.</b> Summary of correlations for chemosensitivity and omics data for compound <b>1</b>                                                                                                                                                                                   | <b>S39</b>  |
| <b>Table S10.</b> Summary of top 10 overlaps between all gene sets of the molecular signatures database (MSigDB) and the input gene set of hypermethylated genes negatively correlated with <i>SLC47A1</i> expression.                                                               | <b>S40</b>  |
| <b>Figure S7.</b> Pre-screening of HCT-116 colon cancer cells for the effects of epigenetic drugs on cell viability and accumulation of compound <b>1</b> .                                                                                                                          | <b>S42</b>  |
| <b>Figure S8.</b> (A) Western blot analysis of hMATE1 protein in HCT-116 cell lysates. B) Cell proliferation assay for HCT-116 cells.                                                                                                                                                | <b>S43</b>  |
| <b>Figure S9.</b> Full-length, uncropped/unprocessed image of Western blots presented in Fig. 3a                                                                                                                                                                                     | <b>S44</b>  |
| <b>Figure S10.</b> Full-length, uncropped/unprocessed image of Western blots presented in Fig. 4f                                                                                                                                                                                    | <b>S45</b>  |
| <b>Assay Layouts AL1–AL4</b>                                                                                                                                                                                                                                                         | <b>S46</b>  |
| <b>Experimental Details for Assays</b> _____                                                                                                                                                                                                                                         | <b>S48</b>  |
| <b>Assays and sample preparation for confocal microscopy analysis</b> _____                                                                                                                                                                                                          | <b>S48</b>  |
| <b>Assays and sample preparation for ICP-MS analysis</b> _____                                                                                                                                                                                                                       | <b>S49</b>  |
| <b>Assays and sample preparation for cell viability analysis</b> _____                                                                                                                                                                                                               | <b>S49</b>  |
| <b>SI References</b> _____                                                                                                                                                                                                                                                           | <b>S51</b>  |

**Table S1.** Summary of RNA sequences used in RNAi experiments.

|            | <b>Seq</b>                                   | <b>ID<sup>a</sup></b> | <b>Sense (5' to 3')</b> | <b>Antisense (5' to 3')</b> |
|------------|----------------------------------------------|-----------------------|-------------------------|-----------------------------|
| <b>I</b>   | Silencer siRNA                               | 140539                | CCGAGACAUCAUUAUCUGtt    | CAGAUUAAUGAUGUCUCGGtc       |
| <b>II</b>  | Silencer Select siRNA1                       | s30533                | CAAACUUGAUUCCAGUAtt     | UACUGGGAAAUCAAGUUUGcc       |
| <b>III</b> | Silencer Select siRNA2                       | s30534                | GAUCGUAACUGGAGUUGCatt   | UGCAACUCCAGUUACGAUct        |
| <b>IV</b>  | Silencer Negative Control #3<br>siRNA        | AM4615                | N/A                     | N/A                         |
| <b>V</b>   | Silencer Select Negative<br>Control #1 siRNA | 4390843               | N/A                     | N/A                         |

<sup>a</sup> All Thermo Fisher.

**Table S2.** Summary of antibodies used in assays.

|          | <b>Protein</b>                                          | <b>ID</b>                | <b>Application</b> | <b>Dilution</b> |
|----------|---------------------------------------------------------|--------------------------|--------------------|-----------------|
| <b>1</b> | anti-MATE1 ( <i>SLC47A1</i> ) antibody                  | ab104016 <sup>a</sup>    | immunoblotting     | 1:1,000         |
| <b>2</b> | anti-GAPDH antibody                                     | A300-639A-M <sup>b</sup> | immunoblotting     | 1:1,000         |
| <b>3</b> | goat-anti-rabbit IgG-HRP secondary antibody             | G-21234 <sup>c</sup>     | immunoblotting     | 1:10,000        |
| <b>4</b> | anti-hMATE1 ( <i>SLC47A1</i> ) antibody                 | PA5-2527 <sup>c</sup>    | immunofluorescence | 1:300           |
| <b>5</b> | goat-anti-rabbit IgG Alexa Fluor-635 secondary antibody | A-31576 <sup>c</sup>     | immunofluorescence | 1:400           |

<sup>a</sup> Abcam, <sup>b</sup> Bethyl, <sup>c</sup> Thermo Fisher/Invitrogen.

**Table S3.** Ten NCI-60 cell lines most sensitive to compound **1** and their genetic backgrounds

| Tissue of Origin | Cell Line | log <sub>10</sub> GI <sub>50</sub> | Mutated Cancer Genes |             |             |            |               |             |             |
|------------------|-----------|------------------------------------|----------------------|-------------|-------------|------------|---------------|-------------|-------------|
|                  |           |                                    | <i>CDKN2A</i>        | <i>TP53</i> | <i>PTEN</i> | <i>RB1</i> | <i>PIK3CA</i> | <i>KRAS</i> | <i>BRAF</i> |
| Lung             | NCI-H460  | < -8.00                            | ■                    |             |             |            | ■             | ■           |             |
|                  | NCI-H226  | < -8.00                            | ■                    |             |             |            |               |             |             |
|                  | NCI-H522  | -7.92                              |                      | ■           |             |            |               |             |             |
|                  | A549      | < -8.00                            | ■                    |             |             |            |               | ■           |             |
| CNS              | SF-295    | -7.88                              | ■                    | ■           | ■           |            |               |             |             |
| Renal            | SN12C     | < -8.00                            |                      | ■           |             |            |               |             |             |
| Melanoma         | SK-MEL-5  | -7.75                              | ■                    |             |             |            |               |             | ■           |
|                  | UACC-62   | < -8.00                            | ■                    |             | ■           |            |               |             | ■           |
| Prostate         | DU-145    | < -8.00                            | ■                    | ■           |             | ■          |               |             |             |
| Breast           | T-47D     | -7.83                              |                      | ■           |             |            | ■             |             |             |

■ Homozygous mutation/deletion    ■ Heterozygous mutation/deletion (based on refs. 1 and 2)

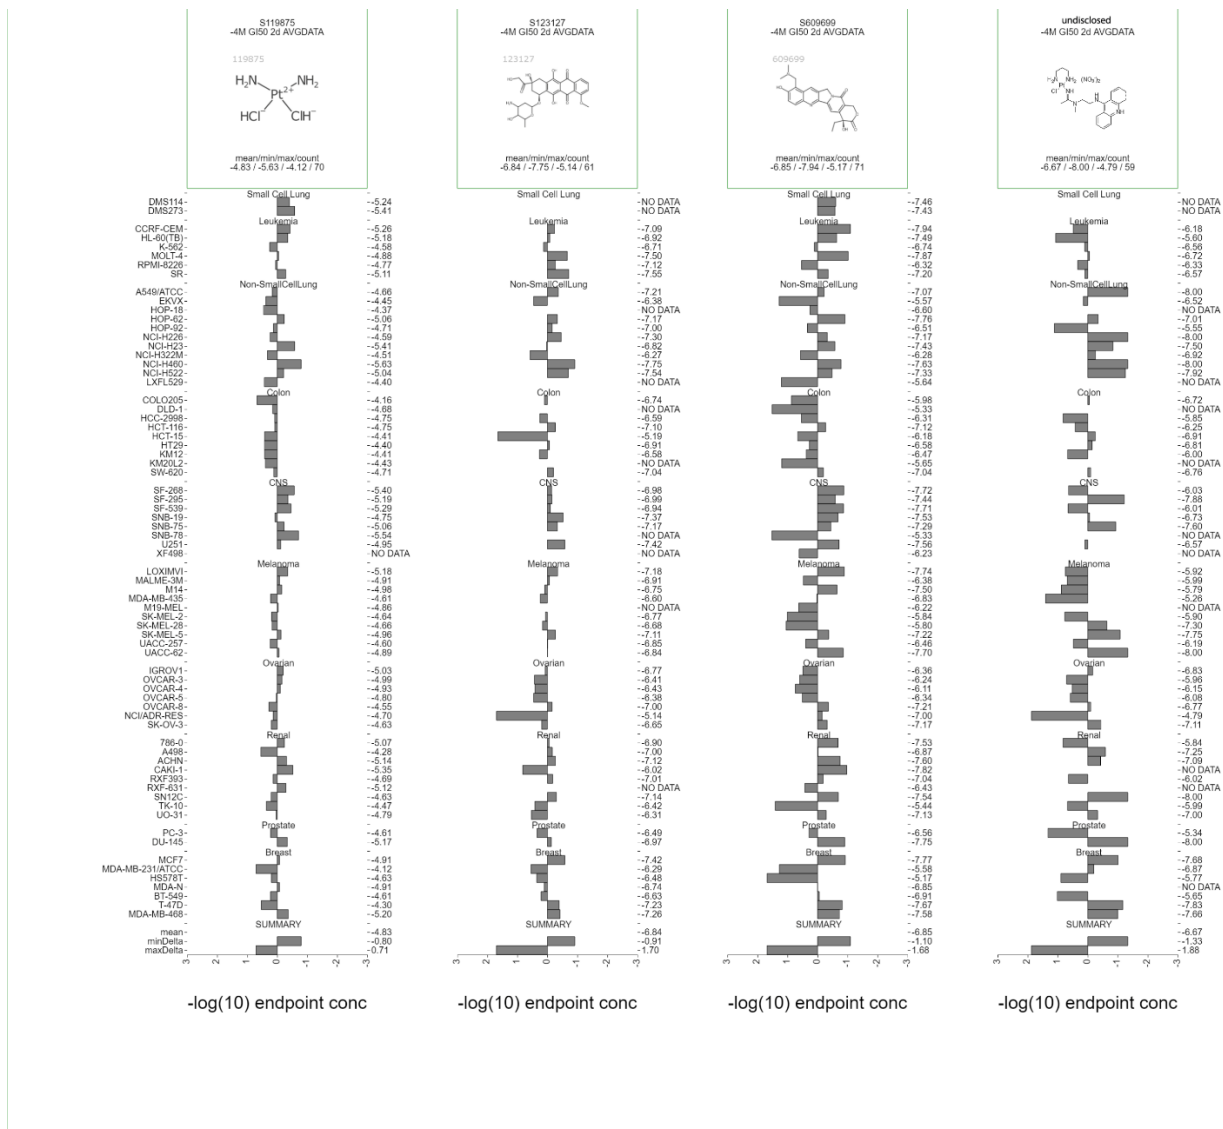

**Figure S1.** Comparison of NCI-60 chemosensitivity profiles (averages of at least 2 assays) for cisplatin (CDDP, NSC 119875), doxorubicin (DOX, NSC 123127), topotecan (TOP, NSC 609699), and compound 1 (NSC # not disclosed).

**Table S4.** Results of NCI COMPARE analysis: positive and negative correlations between chemosensitivity (NCI-60, logGI50) and microarray gene expression data (z-scores)

| Entry | Positive Correlation |                | Negative Correlation |             | $p < 0.00001$ | ***** |
|-------|----------------------|----------------|----------------------|-------------|---------------|-------|
| #     | Pearson's R          | Gene Symbol    | Pearson's R          | Gene Symbol | $p < 0.0001$  | ****  |
| 1     | <b>0.692</b>         | <b>SLC47A1</b> | -0.525               | ZNF330      | $p < 0.001$   | ***   |
| 2     | 0.541                | CCDC104        | -0.52                | CCT8        | $p < 0.01$    | **    |
| 3     | 0.535                | FAM120AOS      | -0.511               | MYSM1       | $p < 0.05$    | *     |
| 4     | 0.533                | CCDC113        | -0.504               | TMEM222     |               |       |
| 5     | 0.531                | LOC100268168   | -0.501               | CIDEB       |               |       |
| 6     | 0.527                | DOLK           | -0.489               | MRPL41      |               |       |
| 7     | 0.522                | NQO1           | -0.485               | RQCD1       |               |       |
| 8     | 0.519                | POLDIP2        | -0.477               | ADCY10P1    |               |       |
| 9     | 0.513                | ARL8A          | -0.477               | DUSP7       |               |       |
| 10    | 0.509                | PHLPP2         | -0.476               | WRAP73      |               |       |
| 11    | 0.508                | MOCS2          | -0.475               | GK2         |               |       |
| 12    | 0.499                | LOC100287590   | -0.474               | NDST1       |               |       |
| 13    | 0.497                | DOCK1          | -0.474               | SMU1        |               |       |
| 14    | 0.495                | AKAP10         | -0.473               | PEX5        |               |       |
| 15    | 0.495                | TNPO1          | -0.47                | DR1         |               |       |
| 16    | 0.489                | LOC728431      | -0.47                | FOXJ3       |               |       |
| 17    | 0.487                | ULK1           | -0.47                | RFX3        |               |       |
| 18    | 0.486                | ZNF652         | -0.469               | LARS        |               |       |
| 19    | 0.484                | TMTC3          | -0.468               | WASF2       |               |       |
| 20    | 0.478                | CLIP1          | -0.466               | SYNPO2      |               |       |
| 21    | 0.476                | TENC1          | -0.462               | SYNCRIP     |               |       |
| 22    | 0.476                | KIAA1841       | -0.461               | SMIM8       |               |       |
| 23    | 0.476                | C5AR1          | -0.453               | ZNF451      |               |       |
| 24    | 0.475                | SQSTM1         | -0.451               | MAP3K19     |               |       |
| 25    | 0.474                | TMEM218        | -0.449               | RBM15       |               |       |
| 26    | 0.474                | LOC100287525   | -0.447               | KHSRP       |               |       |
| 27    | 0.473                | ANKRD40        | -0.446               | LRRC3B      |               |       |
| 28    | 0.47                 | SNRNP27        | -0.446               | PVT1        |               |       |
| 29    | 0.468                | TACO1          | -0.444               | ADH1B       |               |       |
| 30    | 0.467                | FBXL20         | -0.441               | CSRNP3      |               |       |
| 31    | 0.465                | IFT27          | -0.44                | IPO5        |               |       |
| 32    | 0.464                | ZNF219         | -0.44                | DNAH2       |               |       |
| 33    | 0.464                | UNC119         | -0.44                | CSF2        |               |       |
| 34    | 0.463                | HFE            | -0.44                | DPH2        |               |       |
| 35    | 0.463                | PSMD11         | -0.438               | MKI67IP     |               |       |

|    |       |           |        |              |
|----|-------|-----------|--------|--------------|
| 36 | 0.462 | TAOK1     | -0.438 | TARP         |
| 37 | 0.462 | SEMA3C    | -0.435 | BABAM1       |
| 38 | 0.459 | SKP1      | -0.434 | NCS1         |
| 39 | 0.457 | TXNRD1    | -0.434 | EXOSC3       |
| 40 | 0.456 | TMLHE     | -0.433 | FAM186B      |
| 41 | 0.455 | LRRC23    | -0.433 | DIAPH2       |
| 42 | 0.454 | HSF4      | -0.431 | EPAG         |
| 43 | 0.453 | ZBTB40    | -0.431 | VCPIP1       |
| 44 | 0.453 | MAN1A2    | -0.43  | FAM91A1      |
| 45 | 0.452 | ADSSL1    | -0.428 | TTYH1        |
| 46 | 0.452 | ACACB     | -0.428 | RBM33        |
| 47 | 0.452 | PCGF2     | -0.428 | TTY9B        |
| 48 | 0.451 | BCAS4     | -0.427 | SLC24A2      |
| 49 | 0.451 | TOB1      | -0.427 | BTF3L4       |
| 50 | 0.45  | RBPMS     | -0.425 | TNFRSF10C    |
| 51 | 0.449 | SNAPIN    | -0.425 | LOC100129250 |
| 52 | 0.449 | RNPEP     | -0.424 | ST6GAL1      |
| 53 | 0.445 | PTGR1     | -0.424 | JPH3         |
| 54 | 0.443 | NINJ1     | -0.424 | TFAP4        |
| 55 | 0.443 | SRXN1     | -0.422 | ZNF473       |
| 56 | 0.443 | NFYB      | -0.421 | FHIT         |
| 57 | 0.441 | RHBDL3    | -0.421 | XAB2         |
| 58 | 0.439 | WBP1      | -0.421 | ZMYM2        |
| 59 | 0.437 | PSMD3     | -0.42  | VAPB         |
| 60 | 0.437 | NT5C3B    | -0.42  | KCNQ5        |
| 61 | 0.437 | STAT3     | -0.42  | ZNF800       |
| 62 | 0.437 | FBXW4     | -0.418 | WDR52        |
| 63 | 0.435 | COPRS     | -0.416 | KRT77        |
| 64 | 0.434 | FAM188B   | -0.416 | ZRANB2       |
| 65 | 0.434 | F2RL2     | -0.416 | CCL16        |
| 66 | 0.434 | GOLGA1    | -0.416 | LOC284998    |
| 67 | 0.433 | VEZT      | -0.415 | SLC43A3      |
| 68 | 0.433 | ZBTB41    | -0.415 | POLR1E       |
| 69 | 0.433 | NFU1      | -0.415 | CDKN3        |
| 70 | 0.432 | MFSD5     | -0.415 | KIAA1009     |
| 71 | 0.431 | RUFY2     | -0.414 | RIN3         |
| 72 | 0.431 | GABARAPL2 | -0.414 | TPPP2        |
| 73 | 0.43  | TMEM5     | -0.414 | ORMDL1       |
| 74 | 0.43  | OLFM1     | -0.414 | CHRAC1       |
| 75 | 0.43  | TRNP1     | -0.414 | CCDC18       |



|     |       |          |        |           |
|-----|-------|----------|--------|-----------|
| 76  | 0.43  | PQLC3    | -0.414 | RPA2      |
| 77  | 0.43  | HOXC13   | -0.414 | NKTR      |
| 78  | 0.43  | ABHD15   | -0.413 | FMNL3     |
| 79  | 0.429 | TRIM23   | -0.413 | ADAM1A    |
| 80  | 0.429 | ZNF268   | -0.413 | AKAP8     |
| 81  | 0.429 | FBXO21   | -0.413 | TMED5     |
| 82  | 0.429 | HOXA-AS2 | -0.412 | UBE2V2    |
| 83  | 0.428 | KIAA0319 | -0.412 | LOC643837 |
| 84  | 0.428 | KYNU     | -0.412 | ATXN3     |
| 85  | 0.428 | TBK1     | -0.412 | INPP4B    |
| 86  | 0.428 | TMEM132A | -0.412 | NMUR1     |
| 87  | 0.428 | MPP3     | -0.411 | ZZZ3      |
| 88  | 0.427 | BLVRA    | -0.41  | TRMT61A   |
| 89  | 0.427 | EGF      | -0.41  | LPCAT4    |
| 90  | 0.427 | IRX2     | -0.41  | U2AF1     |
| 91  | 0.427 | WIPF2    | -0.41  | PPP1R8    |
| 92  | 0.426 | RHBDD2   | -0.409 | C4orf47   |
| 93  | 0.425 | SETD1A   | -0.409 | ATAD3A    |
| 94  | 0.425 | UNKL     | -0.409 | ELL       |
| 95  | 0.425 | FDXR     | -0.409 | TMEM69    |
| 96  | 0.424 | G6PD     | -0.409 | LINC00337 |
| 97  | 0.424 | LETM1    | -0.408 | LYAR      |
| 98  | 0.424 | NLGN4Y   | -0.407 | PDE4C     |
| 99  | 0.424 | WISP2    | -0.406 | LRRC58    |
| 100 | 0.423 | MMP28    | -0.406 | ODF2L     |
| 101 | 0.422 | TUBG1    | -0.406 | RPF2      |
| 102 | 0.422 | MTA3     | -0.406 | TWF2      |
| 103 | 0.421 | ERAL1    | -0.406 | ZNF251    |
| 104 | 0.421 | MED13    | -0.406 | USE1      |
| 105 | 0.421 | LRIG2    | -0.405 | OTUD6B    |
| 106 | 0.421 | VMO1     | -0.405 | TCEB1     |
| 107 | 0.42  | DAZAP2   | -0.405 | HIST1H4D  |
| 108 | 0.42  | ATXN1L   | -0.405 | PDIA5     |
| 109 | 0.42  | JOSD2    | -0.404 | MDM2      |
| 110 | 0.42  | AP1G1    | -0.404 | SMARCA4   |
| 111 | 0.419 | IDNK     | -0.403 | MUC3      |
| 112 | 0.419 | SPATS2   | -0.402 | MBD1      |
| 113 | 0.419 | SLC35E3  | -0.402 | UBE3D     |
| 114 | 0.419 | CD163    | -0.402 | ANKZF1    |
| 115 | 0.419 | DYNC2LI1 | -0.402 | GSTM5     |

|     |       |           |        |              |
|-----|-------|-----------|--------|--------------|
| 116 | 0.419 | TLE2      | -0.4   | C19orf70     |
| 117 | 0.419 | MAP2K4    | -0.399 | CCNB1IP1     |
| 118 | 0.419 | VMP1      | -0.398 | DBT          |
| 119 | 0.418 | GATA5     | -0.397 | LYNX1        |
| 120 | 0.418 | TP53I11   | -0.397 | DHRS4-AS1    |
| 121 | 0.418 | SDF2      | -0.397 | DNAJA1       |
| 122 | 0.417 | FBXO15    | -0.397 | SLC22A7      |
| 123 | 0.417 | PCDHA     | -0.397 | STX12        |
| 124 | 0.417 | AGGF1     | -0.397 | AGFG2        |
| 125 | 0.417 | CDK3      | -0.396 | CSPG4        |
| 126 | 0.417 | NR1H2     | -0.396 | PLVAP        |
| 127 | 0.416 | KIAA0100  | -0.396 | PTER         |
| 128 | 0.416 | TSSK6     | -0.396 | CEP152       |
| 129 | 0.416 | TRADD     | -0.395 | ZER1         |
| 130 | 0.415 | MARK3     | -0.393 | DDX18        |
| 131 | 0.415 | MSL1      | -0.393 | LINC00312    |
| 132 | 0.415 | GSR       | -0.393 | SMIM12       |
| 133 | 0.415 | FAM134B   | -0.393 | NDUFB6       |
| 134 | 0.414 | ATG10     | -0.393 | PFKFB1       |
| 135 | 0.414 | MLIP      | -0.393 | PLAG1        |
| 136 | 0.413 | GJC2      | -0.392 | SRSF3        |
| 137 | 0.412 | CCDC121   | -0.391 | GRK1         |
| 138 | 0.411 | XYLT2     | -0.391 | LOC100505964 |
| 139 | 0.411 | MEGF9     | -0.391 | HEMK1        |
| 140 | 0.411 | FLJ12120  | -0.391 | NES          |
| 141 | 0.411 | SLC30A5   | -0.391 | OBP2B        |
| 142 | 0.41  | TRIM16    | -0.391 | ZMYND11      |
| 143 | 0.41  | AMFR      | -0.39  | DDX49        |
| 144 | 0.41  | SPAG5     | -0.39  | PHIP         |
| 145 | 0.409 | FAM155B   | -0.389 | MPPE1        |
| 146 | 0.409 | SRGAP3    | -0.389 | PREP         |
| 147 | 0.409 | MOB3B     | -0.389 | GATA5        |
| 148 | 0.409 | SNF8      | -0.389 | ZNF544       |
| 149 | 0.408 | RABGAP1   | -0.389 | E4F1         |
| 150 | 0.408 | BLVRB     | -0.389 | RIOK3        |
| 151 | 0.408 | CLTC      | -0.388 | SCN2B        |
| 152 | 0.407 | NKIRAS2   | -0.388 | LRRC14       |
| 153 | 0.407 | SIRT3     | -0.388 | MON1A        |
| 154 | 0.406 | BMPR1A    | -0.388 | CCDC58       |
| 155 | 0.406 | LOC399884 | -0.387 | METTL8       |

|     |       |              |        |              |
|-----|-------|--------------|--------|--------------|
| 156 | 0.406 | PSMG4        | -0.387 | TMEM51-AS1   |
| 157 | 0.405 | BLOC1S2      | -0.387 | ANPEP        |
| 158 | 0.405 | IDE          | -0.387 | APPL1        |
| 159 | 0.405 | DHX29        | -0.386 | PPP1R3E      |
| 160 | 0.404 | FAM45A       | -0.386 | SIRT6        |
| 161 | 0.404 | C7orf25      | -0.386 | WDR27        |
| 162 | 0.404 | ANKRD32      | -0.386 | RASSF1       |
| 163 | 0.404 | S1PR3        | -0.386 | KCNJ4        |
| 164 | 0.403 | ARHGEF26     | -0.385 | UFM1         |
| 165 | 0.403 | ADORA3       | -0.385 | FAM184B      |
| 166 | 0.402 | C8orf42      | -0.385 | ACOT11       |
| 167 | 0.402 | RNASEH1      | -0.385 | RPF1         |
| 168 | 0.402 | AMER2        | -0.384 | SAMD8        |
| 169 | 0.402 | SREBF1       | -0.384 | WDR48        |
| 170 | 0.402 | PIGS         | -0.383 | GTF2B        |
| 171 | 0.401 | THSD4        | -0.383 | GTPBP5       |
| 172 | 0.401 | SH3BGR       | -0.382 | PDE12        |
| 173 | 0.401 | LRRC46       | -0.382 | ATP11C       |
| 174 | 0.401 | FAM218A      | -0.382 | MTUS2        |
| 175 | 0.4   | MIEN1        | -0.382 | TSPO         |
| 176 | 0.4   | DLGAP1       | -0.382 | CLCN6        |
| 177 | 0.4   | KCNA1        | -0.382 | ARHGAP27     |
| 178 | 0.4   | ACP1         | -0.381 | PMAIP1       |
| 179 | 0.399 | TVP23B       | -0.381 | VPS13A       |
| 180 | 0.399 | ABHD1        | -0.381 | GRPEL2       |
| 181 | 0.399 | ZNF821       | -0.381 | CLECL1       |
| 182 | 0.399 | EIF2B4       | -0.381 | LOC100505519 |
| 183 | 0.399 | GCLM         | -0.381 | PAQR3        |
| 184 | 0.398 | C2CD3        | -0.38  | CD22         |
| 185 | 0.398 | SMIM20       | -0.38  | SLC6A19      |
| 186 | 0.397 | ZNF132       | -0.379 | IDI2         |
| 187 | 0.397 | NBR1         | -0.379 | LSM11        |
| 188 | 0.397 | AQP11        | -0.379 | GTPBP1       |
| 189 | 0.397 | ATP2A2       | -0.379 | CELF6        |
| 190 | 0.397 | SAR1B        | -0.379 | SFPQ         |
| 191 | 0.397 | RUNDC1       | -0.379 | LAMTOR3      |
| 192 | 0.396 | LOC100132004 | -0.379 | LPAR1        |
| 193 | 0.396 | STX17        | -0.379 | POGLUT1      |
| 194 | 0.396 | TMEM178B     | -0.379 | PLA2G2E      |
| 195 | 0.396 | FAM212B      | -0.378 | CYB561D2     |

|     |       |              |        |              |
|-----|-------|--------------|--------|--------------|
| 196 | 0.396 | MEG3         | -0.378 | AURKAIP1     |
| 197 | 0.395 | ASXL2        | -0.378 | MEX3C        |
| 198 | 0.395 | SDSL         | -0.378 | PHF7         |
| 199 | 0.395 | EID3         | -0.378 | DFFB         |
| 200 | 0.395 | PTRH2        | -0.378 | LOC100499489 |
| 201 | 0.394 | PBX1         | -0.378 | RCL1         |
| 202 | 0.394 | PDE4D        | -0.378 | DNMT1        |
| 203 | 0.394 | NCOA7        | -0.378 | GALNT15      |
| 204 | 0.394 | GBF1         | -0.378 | FLJ39639     |
| 205 | 0.393 | MYBL1        | -0.378 | HLA-DQB1     |
| 206 | 0.393 | TAF15        | -0.378 | RNGTT        |
| 207 | 0.393 | SLC51B       | -0.377 | UMPS         |
| 208 | 0.393 | LOC100506603 | -0.377 | TICRR        |
| 209 | 0.392 | C5AR2        | -0.377 | BRWD3        |
| 210 | 0.392 | KDM6A        | -0.377 | MAX          |
| 211 | 0.392 | TMEM106C     | -0.376 | SRR          |
| 212 | 0.392 | LOC100507501 | -0.376 | LONRF3       |
| 213 | 0.392 | GFM1         | -0.376 | SMARCB1      |
| 214 | 0.392 | EML2         | -0.376 | LHPP         |
| 215 | 0.392 | SLC3A2       | -0.376 | C8orf82      |
| 216 | 0.391 | JAM3         | -0.376 | BCL10        |
| 217 | 0.391 | FBF1         | -0.375 | LOC100505697 |
| 218 | 0.391 | RNF40        | -0.375 | PNMA3        |
| 219 | 0.39  | FUNDC1       | -0.375 | ZNF41        |
| 220 | 0.39  | RNF135       | -0.375 | IQCB1        |
| 221 | 0.39  | NALCN        | -0.375 | POP1         |
| 222 | 0.39  | LOC100506668 | -0.375 | GPBP1L1      |
| 223 | 0.39  | IL6ST        | -0.375 | AZI2         |
| 224 | 0.39  | SIDT2        | -0.375 | TFB2M        |
| 225 | 0.39  | ZDHHC16      | -0.374 | KLHL21       |
| 226 | 0.39  | PIGX         | -0.374 | FAM154A      |
| 227 | 0.389 | SPR          | -0.374 | GTPBP8       |
| 228 | 0.389 | FKBP15       | -0.374 | RCC1         |
| 229 | 0.389 | IFT43        | -0.374 | CNTROB       |
| 230 | 0.389 | KIAA0195     | -0.374 | ZADH2        |
| 231 | 0.389 | LOC100505564 | -0.374 | ZNF496       |
| 232 | 0.388 | LIX1L        | -0.374 | SLC2A9       |
| 233 | 0.387 | MARCO        | -0.374 | AGXT         |
| 234 | 0.387 | BRCA1        | -0.373 | RTFDC1       |
| 235 | 0.387 | GNRHR        | -0.373 | OPRL1        |

|     |       |              |        |          |
|-----|-------|--------------|--------|----------|
| 236 | 0.387 | BAD          | -0.373 | MTO1     |
| 237 | 0.387 | EPHX1        | -0.373 | TGS1     |
| 238 | 0.386 | EXOC6B       | -0.373 | EIF3G    |
| 239 | 0.386 | EPDR1        | -0.373 | JRK      |
| 240 | 0.386 | PPP1R9A      | -0.373 | MRPL34   |
| 241 | 0.386 | CCDC127      | -0.373 | TWISTNB  |
| 242 | 0.386 | APH1B        | -0.373 | DDX28    |
| 243 | 0.386 | PHF12        | -0.372 | ZNF259   |
| 244 | 0.385 | FAM66D       | -0.372 | CENPW    |
| 245 | 0.385 | ZNF287       | -0.372 | C8orf33  |
| 246 | 0.385 | ZNF688       | -0.372 | DRD3     |
| 247 | 0.385 | JAKMIP3      | -0.372 | BTLA     |
| 248 | 0.385 | C1orf115     | -0.372 | TCF20    |
| 249 | 0.385 | TMED2        | -0.372 | RAD21    |
| 250 | 0.384 | LOC100653206 | -0.371 | MAN1A2   |
| 251 | 0.384 | TRAF4        | -0.371 | CLK1     |
| 252 | 0.384 | HRAS         | -0.371 | PRKACA   |
| 253 | 0.384 | AGBL2        | -0.371 | TIMM44   |
| 254 | 0.384 | FMO5         | -0.371 | TNN      |
| 255 | 0.383 | WDR34        | -0.371 | FGF22    |
| 256 | 0.383 | TUSC3        | -0.371 | SHOX2    |
| 257 | 0.383 | TSKU         | -0.37  | RNF126   |
| 258 | 0.383 | SDK2         | -0.37  | GRIN1    |
| 259 | 0.383 | KDM5B        | -0.37  | C1orf228 |
| 260 | 0.382 | ZMIZ2        | -0.37  | STOML1   |
| 261 | 0.382 | PDCD2        | -0.37  | BOP1     |
| 262 | 0.382 | COX15        | -0.37  | SPATA8   |
| 263 | 0.382 | MYO19        | -0.37  | LRRC4B   |
| 264 | 0.381 | SLC39A8      | -0.369 | CAAP1    |
| 265 | 0.381 | DDB2         | -0.369 | SEMA6D   |
| 266 | 0.381 | IFT140       | -0.369 | CCNC     |
| 267 | 0.381 | RPGRIP1L     | -0.369 | WWP2     |
| 268 | 0.381 | SHC1         | -0.369 | LONP1    |
| 269 | 0.381 | TBC1D5       | -0.369 | PYGB     |
| 270 | 0.38  | SLC22A5      | -0.368 | CHERP    |
| 271 | 0.38  | PCYOX1       | -0.368 | USP6     |
| 272 | 0.38  | ZNF334       | -0.368 | KCTD5    |
| 273 | 0.38  | DHX40        | -0.368 | AFF2     |
| 274 | 0.38  | SLC48A1      | -0.368 | KDM4D    |
| 275 | 0.38  | MAFK         | -0.368 | PASD1    |

|     |       |              |        |            |
|-----|-------|--------------|--------|------------|
| 276 | 0.38  | ZCRB1        | -0.367 | MRTO4      |
| 277 | 0.38  | CHRM4        | -0.367 | MYOT       |
| 278 | 0.38  | BTBD11       | -0.367 | CBX2       |
| 279 | 0.38  | ABHD4        | -0.367 | PADI4      |
| 280 | 0.38  | FGD6         | -0.366 | LPCAT2     |
| 281 | 0.379 | OAZ3         | -0.366 | SLC17A9    |
| 282 | 0.379 | INVS         | -0.366 | WDTC1      |
| 283 | 0.379 | TMEM18       | -0.366 | MPEG1      |
| 284 | 0.379 | LOC339803    | -0.365 | ZRANB2-AS1 |
| 285 | 0.379 | MDM2         | -0.365 | NDUFB7     |
| 286 | 0.379 | DICER1       | -0.365 | TMEM39A    |
| 287 | 0.379 | KIAA0895     | -0.365 | ENTPD8     |
| 288 | 0.378 | LOC100130502 | -0.365 | ECHDC1     |
| 289 | 0.378 | P2RX4        | -0.365 | ZNF182     |
| 290 | 0.378 | DALRD3       | -0.365 | IGH        |
| 291 | 0.378 | ZFAND4       | -0.364 | TRMT1      |
| 292 | 0.378 | ADIPOR1      | -0.364 | JMJD1C     |
| 293 | 0.378 | CUZD1        | -0.364 | LINC00338  |
| 294 | 0.377 | G6PC3        | -0.364 | OPTC       |
| 295 | 0.377 | RNH1         | -0.364 | SYNJ2      |
| 296 | 0.377 | ASPN         | -0.364 | RAD54L     |
| 297 | 0.377 | TMEM256      | -0.364 | OSGEP      |
| 298 | 0.377 | KLF7         | -0.364 | ROBO4      |
| 299 | 0.377 | RDM1         | -0.364 | TPD52L2    |
| 300 | 0.377 | JKAMP        | -0.364 | TAOK3      |
| 301 | 0.377 | CCND3        | -0.364 | PLD4       |
| 302 | 0.377 | RPL3L        | -0.363 | RPS28      |
| 303 | 0.377 | ALPK1        | -0.363 | ADO        |
| 304 | 0.377 | TMEM254-AS1  | -0.363 | MAP2K7     |
| 305 | 0.376 | KRIT1        | -0.363 | MAP3K7     |
| 306 | 0.376 | RAB5C        | -0.363 | CMKLR1     |
| 307 | 0.376 | KBTBD4       | -0.363 | GANC       |
| 308 | 0.376 | SNX17        | -0.363 | IL11RA     |
| 309 | 0.376 | XIAP         | -0.363 | AQP8       |
| 310 | 0.376 | CCS          | -0.363 | RAB3IP     |
| 311 | 0.375 | GPC1         | -0.363 | NHP2L1     |
| 312 | 0.375 | CLU          | -0.362 | CLPP       |
| 313 | 0.375 | ALDH3A2      | -0.362 | CCR3       |
| 314 | 0.375 | NF1          | -0.362 | DSEL       |
| 315 | 0.375 | TP53I3       | -0.362 | CDC40      |

|     |       |              |        |              |
|-----|-------|--------------|--------|--------------|
| 316 | 0.375 | DLGAP1-AS1   | -0.362 | FAM69A       |
| 317 | 0.374 | KAT2A        | -0.362 | UBIAD1       |
| 318 | 0.374 | COPZ1        | -0.362 | EEF1A1       |
| 319 | 0.374 | LOC100996321 | -0.362 | KRTAP10-12   |
| 320 | 0.374 | SLC22A17     | -0.361 | CCDC93       |
| 321 | 0.373 | EFNA3        | -0.361 | TTK          |
| 322 | 0.373 | EMX2         | -0.361 | LOC390705    |
| 323 | 0.373 | YLPM1        | -0.361 | IL12RB1      |
| 324 | 0.373 | BTD          | -0.361 | INTS1        |
| 325 | 0.373 | PRDM15       | -0.361 | PTPN22       |
| 326 | 0.373 | IL20RB       | -0.361 | LOC100499227 |
| 327 | 0.373 | MCPH1        | -0.361 | LOC100240728 |
| 328 | 0.372 | CCNB1        | -0.361 | DPH3         |
| 329 | 0.372 | C12orf10     | -0.361 | MED30        |
| 330 | 0.372 | AMZ2         | -0.361 | KLC4         |
| 331 | 0.372 | CISD3        | -0.361 | DUSP15       |
| 332 | 0.371 | KCTD20       | -0.36  | SRSF11       |
| 333 | 0.371 | HCP5         | -0.36  | SLC26A8      |
| 334 | 0.371 | SLC6A2       | -0.36  | USP37        |
| 335 | 0.371 | SETDB1       | -0.36  | WNT10A       |
| 336 | 0.371 | TRIM3        | -0.36  | BRD4         |
| 337 | 0.371 | SLC30A1      | -0.36  | MIOX         |
| 338 | 0.371 | LOC728012    | -0.36  | CDC37        |
| 339 | 0.37  | SHC2         | -0.36  | N4BP1        |
| 340 | 0.37  | EFEMP1       | -0.359 | POLR2K       |
| 341 | 0.37  | BAZ2A        | -0.359 | C9orf123     |
| 342 | 0.37  | RP9P         | -0.359 | TSHZ1        |
| 343 | 0.37  | COQ6         | -0.359 | IPCEF1       |
| 344 | 0.37  | AP3M2        | -0.359 | ABHD14A      |
| 345 | 0.37  | LOC100288911 | -0.359 | LRIG1        |
| 346 | 0.37  | DCST2        | -0.358 | SCTR         |
| 347 | 0.37  | FAM24B       | -0.358 | GPATCH2L     |
| 348 | 0.369 | ZNF687       | -0.358 | RRS1         |
| 349 | 0.369 | BPTF         | -0.358 | MARK1        |
| 350 | 0.369 | FOXN3-AS1    | -0.358 | SASS6        |
| 351 | 0.369 | CSPG5        | -0.358 | C17orf105    |
| 352 | 0.369 | VPS9D1       | -0.358 | CFC1B        |
| 353 | 0.369 | MALSU1       | -0.358 | RPS6KA1      |
| 354 | 0.369 | DND1         | -0.357 | PLA2G12B     |
| 355 | 0.368 | HSPB8        | -0.357 | MTSS1        |

|     |       |            |        |              |
|-----|-------|------------|--------|--------------|
| 356 | 0.368 | ZNF76      | -0.357 | LINC00852    |
| 357 | 0.368 | PAQR6      | -0.357 | FAM3C        |
| 358 | 0.368 | ZDHHC11    | -0.357 | TSPAN11      |
| 359 | 0.368 | AGFG1      | -0.357 | LOC100508120 |
| 360 | 0.368 | NR5A2      | -0.357 | ERO1L        |
| 361 | 0.368 | ALG13      | -0.356 | RPS6KA2      |
| 362 | 0.368 | ETAA1      | -0.356 | PRAC         |
| 363 | 0.367 | HSPB7      | -0.356 | MAT1A        |
| 364 | 0.367 | SYT3       | -0.356 | DSCR3        |
| 365 | 0.367 | PLEKHH3    | -0.356 | MYL7         |
| 366 | 0.367 | SIAH1      | -0.356 | NOM1         |
| 367 | 0.367 | FMNL3      | -0.356 | HOXA-AS4     |
| 368 | 0.367 | KRT86      | -0.356 | SERBP1       |
| 369 | 0.367 | TXNRD3     | -0.356 | HYAL3        |
| 370 | 0.366 | TNRC18     | -0.356 | GNL2         |
| 371 | 0.366 | PYY        | -0.355 | ILVBL        |
| 372 | 0.366 | LXN        | -0.355 | USP33        |
| 373 | 0.366 | NEO1       | -0.355 | SERP1        |
| 374 | 0.366 | SIX5       | -0.355 | CYTH3        |
| 375 | 0.366 | LYRM9      | -0.354 | PAPSS1       |
| 376 | 0.366 | DHX57      | -0.354 | PGPEP1       |
| 377 | 0.365 | MFF        | -0.354 | TSGA10       |
| 378 | 0.365 | MAPT       | -0.354 | PRPF38A      |
| 379 | 0.365 | SDCBP2-AS1 | -0.354 | UBE3A        |
| 380 | 0.365 | C2orf76    | -0.353 | CCNJ         |
| 381 | 0.365 | NPPA       | -0.353 | LOC285812    |
| 382 | 0.365 | LYPLAL1    | -0.353 | UHRF2        |
| 383 | 0.364 | MTMR12     | -0.353 | AK2          |
| 384 | 0.364 | ULK2       | -0.353 | FBXO10       |
| 385 | 0.364 | COL4A4     | -0.353 | NSUN6        |
| 386 | 0.364 | CD99P1     | -0.353 | SPEN         |
| 387 | 0.364 | ARL2BP     | -0.353 | SRSF12       |
| 388 | 0.364 | STX6       | -0.353 | TRPM1        |
| 389 | 0.364 | SMIM14     | -0.352 | EPHA6        |
| 390 | 0.364 | RAB4B      | -0.352 | SLC27A4      |
| 391 | 0.364 | LEPREL4    | -0.352 | FOSL2        |
| 392 | 0.364 | CWC25      | -0.352 | PPP3CC       |
| 393 | 0.364 | SLC8A1     | -0.352 | BLK          |
| 394 | 0.364 | HP07349    | -0.352 | LRRC47       |
| 395 | 0.364 | PSMD4      | -0.352 | AZIN1        |



|     |       |           |        |           |
|-----|-------|-----------|--------|-----------|
| 396 | 0.364 | FAM192A   | -0.352 | FOXK2     |
| 397 | 0.363 | KIAA1324  | -0.352 | PLTP      |
| 398 | 0.363 | PSMA2     | -0.352 | NCSTN     |
| 399 | 0.363 | SIX3-AS1  | -0.352 | DCLRE1C   |
| 400 | 0.363 | ZMAT5     | -0.352 | C3orf38   |
| 401 | 0.363 | ASMT      | -0.352 | TMEM133   |
| 402 | 0.363 | TOP2A     | -0.352 | LRRC40    |
| 403 | 0.362 | DDX52     | -0.352 | PFDN6     |
| 404 | 0.362 | AMACR     | -0.352 | DIS3      |
| 405 | 0.362 | STAMPB    | -0.352 | HIVEP3    |
| 406 | 0.362 | SLC38A7   | -0.352 | DCN       |
| 407 | 0.362 | ARF3      | -0.352 | SREBF2    |
| 408 | 0.362 | METRN     | -0.352 | FAM182B   |
| 409 | 0.362 | DCAF8     | -0.351 | BPTF      |
| 410 | 0.362 | GLI4      | -0.351 | NUP214    |
| 411 | 0.362 | ST3GAL2   | -0.351 | ZNF710    |
| 412 | 0.361 | CCL26     | -0.351 | TMEM110   |
| 413 | 0.361 | SNHG10    | -0.351 | SYNPO2L   |
| 414 | 0.361 | CHD9      | -0.351 | DSG3      |
| 415 | 0.361 | ZNF577    | -0.351 | DNAH7     |
| 416 | 0.361 | OMD       | -0.351 | TRPV4     |
| 417 | 0.36  | TOM1L2    | -0.351 | TMEM207   |
| 418 | 0.36  | GRIP1     | -0.351 | ARID1A    |
| 419 | 0.36  | ERLEC1    | -0.351 | C1orf86   |
| 420 | 0.36  | EP400     | -0.351 | ZNF324B   |
| 421 | 0.36  | CFHR4     | -0.35  | TACO1     |
| 422 | 0.36  | GALNT8    | -0.35  | ANKRD13C  |
| 423 | 0.36  | PRPSAP2   | -0.35  | ZNF292    |
| 424 | 0.36  | UBE3B     | -0.35  | PPIP5K2   |
| 425 | 0.359 | ATRAID    | -0.35  | CCDC130   |
| 426 | 0.359 | ADAM17    | -0.35  | DOK3      |
| 427 | 0.359 | MBD5      | -0.35  | VPS13D    |
| 428 | 0.359 | EHD3      | -0.35  | DESI2     |
| 429 | 0.359 | RARB      | -0.35  | LOC221814 |
| 430 | 0.359 | LOC149134 | -0.35  | ETS1      |
| 431 | 0.359 | SURF1     | -0.35  | HSF1      |
| 432 | 0.358 | GFM2      | -0.35  | TBC1D26   |
| 433 | 0.358 | APLP1     | -0.35  | SREK1     |
| 434 | 0.358 | FAM76A    | -0.35  | RAC2      |
| 435 | 0.358 | TAX1BP1   | -0.349 | PIGK      |

|     |       |              |        |            |
|-----|-------|--------------|--------|------------|
| 436 | 0.358 | LINC00669    | -0.349 | NPC1       |
| 437 | 0.358 | NRBP1        | -0.349 | RGCC       |
| 438 | 0.358 | SLC16A4      | -0.349 | PGS1       |
| 439 | 0.358 | ZNF385A      | -0.349 | CLEC12A    |
| 440 | 0.358 | CACNG4       | -0.349 | MAPKAPK3   |
| 441 | 0.358 | B4GALNT1     | -0.349 | C18orf54   |
| 442 | 0.358 | LOC100507481 | -0.349 | GSPT1      |
| 443 | 0.358 | ZNF341       | -0.349 | TIMM13     |
| 444 | 0.358 | PIP4K2B      | -0.349 | FLG-AS1    |
| 445 | 0.358 | SERF1B       | -0.349 | BZRAP1     |
| 446 | 0.357 | CTSL1        | -0.349 | GOLGA8A    |
| 447 | 0.357 | CCDC19       | -0.349 | MMP9       |
| 448 | 0.357 | IFT20        | -0.349 | SHANK3     |
| 449 | 0.357 | SPPL2A       | -0.348 | PITHD1     |
| 450 | 0.357 | THNSL2       | -0.348 | RREB1      |
| 451 | 0.357 | NFIC         | -0.348 | APBA1      |
| 452 | 0.357 | BAIAP2-AS1   | -0.348 | TAF4B      |
| 453 | 0.357 | METAP1       | -0.348 | HCG18      |
| 454 | 0.357 | FTO          | -0.348 | CREBZF     |
| 455 | 0.357 | ZNF281       | -0.348 | EIF5B      |
| 456 | 0.356 | TSKS         | -0.347 | OGFOD3     |
| 457 | 0.356 | FAM224B      | -0.347 | GRIK1-AS1  |
| 458 | 0.356 | C5orf51      | -0.347 | MLLT1      |
| 459 | 0.356 | POMZP3       | -0.347 | SMAD2      |
| 460 | 0.356 | ALOXE3       | -0.347 | TOE1       |
| 461 | 0.355 | ORMDL2       | -0.347 | NKX2-1-AS1 |
| 462 | 0.355 | PAGR1        | -0.347 | CCL23      |
| 463 | 0.355 | ZFPM1        | -0.347 | TRIM25     |
| 464 | 0.355 | LHFPL4       | -0.347 | GNL1       |
| 465 | 0.355 | SLK          | -0.347 | RGS13      |
| 466 | 0.355 | MIF4GD       | -0.347 | CDK6       |
| 467 | 0.355 | RND1         | -0.347 | PAK1IP1    |
| 468 | 0.354 | TLCD1        | -0.347 | CEP63      |
| 469 | 0.354 | TMOD3        | -0.347 | GART       |
| 470 | 0.354 | PEX13        | -0.346 | C2orf69    |
| 471 | 0.354 | AQP8         | -0.346 | CDKN2B     |
| 472 | 0.354 | PLEKHA2      | -0.346 | HSPA1L     |
| 473 | 0.354 | SIX3         | -0.346 | CBLC       |
| 474 | 0.354 | TMEM37       | -0.346 | SMARCC1    |
| 475 | 0.354 | TRIP11       | -0.346 | SPIB       |

|     |       |              |        |              |
|-----|-------|--------------|--------|--------------|
| 476 | 0.354 | ZNF839       | -0.346 | FASTKD5      |
| 477 | 0.354 | WASL         | -0.346 | LOC100131825 |
| 478 | 0.354 | SMARCC2      | -0.346 | TRMT13       |
| 479 | 0.353 | WAC          | -0.346 | FCAR         |
| 480 | 0.353 | CDK5RAP2     | -0.346 | SNHG6        |
| 481 | 0.353 | NOL3         | -0.346 | ZNF644       |
| 482 | 0.353 | PPP2R2C      | -0.346 | LNX2         |
| 483 | 0.353 | SUB1         | -0.346 | RTCA         |
| 484 | 0.353 | ME1          | -0.345 | LINC00293    |
| 485 | 0.353 | TBC1D9B      | -0.345 | STAB2        |
| 486 | 0.353 | FRA10AC1     | -0.345 | CCAR1        |
| 487 | 0.353 | ZNF140       | -0.345 | ZNF775       |
| 488 | 0.353 | HRH3         | -0.345 | VSTM2A       |
| 489 | 0.353 | SPATA20      | -0.345 | FARSA        |
| 490 | 0.353 | SLC35F6      | -0.345 | DRD2         |
| 491 | 0.353 | GADD45G      | -0.345 | TOMM22       |
| 492 | 0.353 | FLJ39632     | -0.345 | WDR90        |
| 493 | 0.353 | INSM1        | -0.345 | PGK1         |
| 494 | 0.352 | OSGIN2       | -0.345 | KCNK7        |
| 495 | 0.352 | FGD4         | -0.344 | SLC16A1      |
| 496 | 0.352 | SLC12A4      | -0.344 | GTF2A1       |
| 497 | 0.352 | CACNA2D3     | -0.344 | FOXO3        |
| 498 | 0.352 | NKAP         | -0.344 | MAFF         |
| 499 | 0.352 | SMO          | -0.344 | LOC200609    |
| 500 | 0.352 | CIDEC        | -0.344 | CCNY         |
| 501 | 0.352 | TRIM68       | -0.344 | NECAP2       |
| 502 | 0.351 | C1orf56      | -0.344 | PSMG1        |
| 503 | 0.351 | CENPK        | -0.344 | MPRIP        |
| 504 | 0.351 | HIST1H3E     | -0.344 | ATF6B        |
| 505 | 0.351 | LOC100507424 | -0.344 | TMEM174      |
| 506 | 0.351 | GSE1         | -0.344 | MIR155HG     |
| 507 | 0.351 | DCC          | -0.343 | UBALD2       |
| 508 | 0.351 | CAP2         | -0.343 | ALS2CR12     |
| 509 | 0.351 | GNB5         | -0.343 | PSIP1        |
| 510 | 0.35  | SNX29        | -0.343 | SLCO4A1      |
| 511 | 0.35  | COASY        | -0.343 | SLC7A1       |
| 512 | 0.35  | AGBL5        | -0.343 | SELK         |
| 513 | 0.35  | VPS72        | -0.343 | TES          |
| 514 | 0.35  | TCTN1        | -0.343 | HS3ST6       |
| 515 | 0.35  | ARID4B       | -0.343 | PRKCB        |

|     |       |         |        |              |
|-----|-------|---------|--------|--------------|
| 516 | 0.35  | IARS2   | -0.343 | SUPT16H      |
| 517 | 0.35  | SPIRE2  | -0.343 | MAEL         |
| 518 | 0.35  | HIBADH  | -0.343 | PPM1A        |
| 519 | 0.35  | TPD52L1 | -0.343 | C11orf21     |
| 520 | 0.35  | AADAC   | -0.343 | MYL3         |
| 521 | 0.35  | OSMR    | -0.342 | LOC100996665 |
| 522 | 0.349 | DNAJC7  | -0.342 | C22orf31     |
| 523 | 0.349 | GGNBP2  | -0.342 | SMIM10       |
| 524 | 0.349 | FAM134C | -0.342 | ELAVL1       |
| 525 | 0.349 | TSACC   | -0.342 | SLC19A1      |
| 526 | 0.349 | HDGFRP3 | -0.342 | FOXN3        |
| 527 | 0.349 | SNCB    | -0.342 | ZNF148       |
| 528 | 0.349 | IGSF9B  | -0.342 | PVR          |
| 529 | 0.349 | GAST    | -0.342 | NUDC         |
| 530 | 0.349 | GRAMD1B | -0.342 | LOC155060    |
| 531 | 0.349 | ADCY6   | -0.341 | IL6ST        |
| 532 | 0.348 | MAGED4  | -0.341 | ARMC6        |
| 533 | 0.348 | HIP1    | -0.341 | NDRG3        |
| 534 | 0.348 | PCGF5   | -0.341 | COL8A2       |
| 535 | 0.348 | LIN7B   | -0.341 | ZNF503-AS2   |
| 536 | 0.348 | NLN     | -0.341 | FAF1         |
| 537 | 0.348 | GAPVD1  | -0.341 | UROS         |
| 538 | 0.348 | GTF3C1  | -0.34  | LILRB3       |
| 539 | 0.348 | CCKBR   | -0.34  | OXSR1        |
| 540 | 0.348 | PLAC4   | -0.34  | UBE2L6       |
| 541 | 0.348 | RAB1A   | -0.34  | EIF2S3       |
| 542 | 0.348 | ZFP1    | -0.34  | DST          |
| 543 | 0.348 | PBXIP1  | -0.34  | ZNHIT6       |
| 544 | 0.348 | DPF1    | -0.34  | SLC30A7      |
| 545 | 0.347 | IGHMBP2 | -0.34  | RPL5         |
| 546 | 0.347 | TMEM107 | -0.34  | PYDC1        |
| 547 | 0.347 | IAH1    | -0.34  | SLC25A32     |
| 548 | 0.347 | TVP23C  | -0.34  | NPFF         |
| 549 | 0.347 | RHBDL1  | -0.34  | PARP8        |
| 550 | 0.347 | GIP     | -0.34  | ABCA9        |
| 551 | 0.347 | PDPN    | -0.339 | ZEB2         |
| 552 | 0.347 | MBTPS1  | -0.339 | PPIE         |
| 553 | 0.347 | PTGES   | -0.339 | UBAP2L       |
| 554 | 0.347 | REEP5   | -0.339 | SSU72        |
| 555 | 0.347 | GPR25   | -0.339 | MGC12488     |

|     |       |          |        |              |
|-----|-------|----------|--------|--------------|
| 556 | 0.346 | CSNK1D   | -0.339 | TRAF3IP2-AS1 |
| 557 | 0.346 | PCGF1    | -0.339 | ING4         |
| 558 | 0.346 | TBCD     | -0.339 | CLASP2       |
| 559 | 0.346 | DNAJC27  | -0.339 | FOSL1        |
| 560 | 0.346 | MAPK9    | -0.339 | C1orf21      |
| 561 | 0.346 | MRPL19   | -0.339 | GRPEL1       |
| 562 | 0.346 | C11orf92 | -0.338 | RPS11        |
| 563 | 0.346 | DYNLL1   | -0.338 | RGL1         |
| 564 | 0.346 | STRN     | -0.338 | PIK3R5       |
| 565 | 0.345 | NDRG4    | -0.338 | RFX1         |
| 566 | 0.345 | AKT1     | -0.338 | ALDOB        |
| 567 | 0.345 | BAI2     | -0.338 | EPS15        |
| 568 | 0.345 | XPR1     | -0.338 | LZTFL1       |
| 569 | 0.345 | C5orf15  | -0.338 | KCNQ3        |
| 570 | 0.345 | PTH1R    | -0.338 | ANKS6        |
| 571 | 0.345 | RFX3     | -0.338 | RIOK2        |
| 572 | 0.345 | ABAT     | -0.337 | MIIP         |
| 573 | 0.345 | CAMSAP1  | -0.337 | NODAL        |
| 574 | 0.344 | ZFP64    | -0.337 | RASL12       |
| 575 | 0.344 | ANKEF1   | -0.337 | NTSR2        |
| 576 | 0.344 | MTX1     | -0.337 | USP4         |
| 577 | 0.344 | SUPT6H   | -0.337 | SNHG12       |
| 578 | 0.344 | TEKT4P2  | -0.336 | IFI44L       |
| 579 | 0.344 | MIER3    | -0.336 | LOC100505702 |
| 580 | 0.344 | ANKRD55  | -0.336 | KCNC4        |
| 581 | 0.344 | DSEL     | -0.336 | YIPF7        |
| 582 | 0.344 | GRAMD1C  | -0.336 | SELRC1       |
| 583 | 0.344 | COL4A6   | -0.336 | MAK16        |
| 584 | 0.344 | UBE2K    | -0.336 | PROL1        |
| 585 | 0.344 | C10orf35 | -0.336 | SRSF4        |
| 586 | 0.343 | ABCC1    | -0.336 | GRIA1        |
| 587 | 0.343 | MYH8     | -0.336 | SNHG5        |
| 588 | 0.343 | GDF11    | -0.335 | POLR1B       |
| 589 | 0.343 | FBXO4    | -0.335 | UBE4B        |
| 590 | 0.343 | ZNF234   | -0.335 | PIGG         |
| 591 | 0.343 | CREBZF   | -0.335 | ZBTB1        |
| 592 | 0.343 | CEP112   | -0.335 | DGCR2        |
| 593 | 0.343 | B3GALT5  | -0.335 | KLF6         |
| 594 | 0.343 | NENF     | -0.335 | ITGB2        |
| 595 | 0.343 | CDKL1    | -0.335 | DNTTIP2      |

|     |       |              |        |           |
|-----|-------|--------------|--------|-----------|
| 596 | 0.342 | LRRC16B      | -0.335 | IRX2      |
| 597 | 0.342 | SWI5         | -0.335 | CNTN5     |
| 598 | 0.342 | DUS3L        | -0.335 | DBR1      |
| 599 | 0.342 | KRT10        | -0.335 | ADAM7     |
| 600 | 0.342 | KCNF1        | -0.335 | TXNL4A    |
| 601 | 0.342 | UNC79        | -0.335 | PURB      |
| 602 | 0.342 | DNAH1        | -0.335 | TMEM68    |
| 603 | 0.342 | TP53I13      | -0.335 | ZNRD1-AS1 |
| 604 | 0.342 | MPHOSPH9     | -0.335 | SCLT1     |
| 605 | 0.342 | POLR2J4      | -0.335 | IGF1      |
| 606 | 0.342 | RNF187       | -0.335 | SAFB      |
| 607 | 0.342 | C9orf16      | -0.335 | LOC283143 |
| 608 | 0.342 | SMEK2        | -0.335 | PCK2      |
| 609 | 0.341 | LMTK2        | -0.334 | HNMT      |
| 610 | 0.341 | UBB          | -0.334 | MDN1      |
| 611 | 0.341 | DSN1         | -0.334 | RGS7BP    |
| 612 | 0.341 | LRP10        | -0.334 | GSDMD     |
| 613 | 0.341 | IDH1-AS1     | -0.334 | ATF6      |
| 614 | 0.341 | PBLD         | -0.334 | SIGLEC6   |
| 615 | 0.341 | YTHDC2       | -0.334 | NUS1      |
| 616 | 0.34  | C11orf16     | -0.334 | ZNF460    |
| 617 | 0.34  | LOC100505622 | -0.334 | OGT       |
| 618 | 0.34  | CNTN1        | -0.334 | HAUS6     |
| 619 | 0.34  | CABYR        | -0.334 | NOTCH4    |
| 620 | 0.34  | SOBP         | -0.334 | CPPED1    |
| 621 | 0.34  | TMEM231      | -0.334 | SERPINB8  |
| 622 | 0.34  | LONP2        | -0.334 | PVRL3     |
| 623 | 0.34  | SF3B3        | -0.334 | RARS2     |
| 624 | 0.34  | TMEM245      | -0.333 | GORASP2   |
| 625 | 0.34  | GPR137       | -0.333 | TSN       |
| 626 | 0.34  | CRLS1        | -0.333 | TBL1XR1   |
| 627 | 0.34  | DNAJC28      | -0.333 | SLC26A6   |
| 628 | 0.34  | DHX8         | -0.333 | ALOX12    |
| 629 | 0.339 | ARFGEF2      | -0.333 | DNAJC8    |
| 630 | 0.339 | ABCA8        | -0.333 | NUPL2     |
| 631 | 0.339 | PDCL2        | -0.333 | UGT2B15   |
| 632 | 0.339 | GFOD2        | -0.333 | OSCAR     |
| 633 | 0.339 | RASGEF1C     | -0.333 | CNPPD1    |
| 634 | 0.339 | PXN          | -0.333 | NOP16     |
| 635 | 0.339 | C1orf27      | -0.333 | LOC401176 |

|     |       |           |        |          |
|-----|-------|-----------|--------|----------|
| 636 | 0.339 | RECQL5    | -0.333 | MUL1     |
| 637 | 0.339 | TCEA2     | -0.333 | MIR143HG |
| 638 | 0.339 | ODF3L1    | -0.332 | KCNK10   |
| 639 | 0.339 | MON2      | -0.332 | ZNF266   |
| 640 | 0.339 | ZNF226    | -0.332 | FUS      |
| 641 | 0.338 | CDK12     | -0.332 | ATP10A   |
| 642 | 0.338 | GTF2H2    | -0.332 | TPSG1    |
| 643 | 0.338 | ATP6V0A1  | -0.332 | NCAPH2   |
| 644 | 0.338 | FGG       | -0.332 | CSPP1    |
| 645 | 0.338 | AK7       | -0.332 | PPIL3    |
| 646 | 0.338 | DPY19L1P1 | -0.332 | KRTDAP   |
| 647 | 0.338 | TFE3      | -0.332 | AMD1     |
| 648 | 0.338 | TMEM8B    | -0.332 | STK17B   |
| 649 | 0.338 | GAA       | -0.332 | PARL     |
| 650 | 0.338 | CHD3      | -0.332 | HLF      |
| 651 | 0.338 | C17orf97  | -0.331 | RORA     |
| 652 | 0.338 | ZDHHC12   | -0.331 | ADRA1A   |
| 653 | 0.338 | CYB5D2    | -0.331 | TLE4     |
| 654 | 0.337 | NSF       | -0.331 | DIO2     |
| 655 | 0.337 | JAK3      | -0.331 | MTFR1    |
| 656 | 0.337 | TUBD1     | -0.331 | CHD4     |
| 657 | 0.337 | PI4KB     | -0.331 | DCAF13   |
| 658 | 0.337 | TAF10     | -0.331 | GNG5     |
| 659 | 0.337 | RNF112    | -0.331 | ABCB1    |
| 660 | 0.337 | FCER1A    | -0.331 | WNK2     |
| 661 | 0.337 | IGFBP4    | -0.331 | RAB8A    |
| 662 | 0.337 | KCNK15    | -0.331 | YME1L1   |
| 663 | 0.337 | CD160     | -0.331 | ZBTB7A   |
| 664 | 0.337 | NES       | -0.331 | TSC2     |
| 665 | 0.337 | PPAP2A    | -0.331 | ZFPL1    |
| 666 | 0.337 | SULT4A1   | -0.331 | OSBPL2   |
| 667 | 0.337 | MTFMT     | -0.33  | ZRANB1   |
| 668 | 0.337 | AP4E1     | -0.33  | NIPAL3   |
| 669 | 0.337 | C2orf72   | -0.33  | CHRM2    |
| 670 | 0.337 | TRPV5     | -0.33  | DOCK8    |
| 671 | 0.337 | ITLN1     | -0.33  | FAR2     |
| 672 | 0.336 | LLGL1     | -0.33  | ZNF445   |
| 673 | 0.336 | ASTN2     | -0.33  | CDX4     |
| 674 | 0.336 | COX7A2L   | -0.33  | EMILIN2  |
| 675 | 0.336 | CACNA1D   | -0.33  | RD3      |

|     |       |              |        |              |
|-----|-------|--------------|--------|--------------|
| 676 | 0.336 | AKT1S1       | -0.33  | DNASE1L1     |
| 677 | 0.336 | PTPLAD1      | -0.33  | SNRPE        |
| 678 | 0.336 | ZNF609       | -0.33  | STX4         |
| 679 | 0.336 | FAM177A1     | -0.33  | LOC100996694 |
| 680 | 0.336 | MFI2-AS1     | -0.329 | KCNQ2        |
| 681 | 0.336 | CCDC74A      | -0.329 | ISY1         |
| 682 | 0.336 | MAR6         | -0.329 | LOC146880    |
| 683 | 0.336 | WWC2-AS2     | -0.329 | REG3A        |
| 684 | 0.336 | ACBD6        | -0.329 | UTP23        |
| 685 | 0.336 | GOSR1        | -0.329 | C15orf39     |
| 686 | 0.336 | VPS41        | -0.329 | SSSCA1       |
| 687 | 0.336 | SULT1A3      | -0.329 | SDR16C5      |
| 688 | 0.336 | AP3B1        | -0.329 | CHD7         |
| 689 | 0.336 | CUEDC1       | -0.329 | ARID1B       |
| 690 | 0.335 | AP2B1        | -0.329 | PRCD         |
| 691 | 0.335 | TBX3         | -0.329 | WDR81        |
| 692 | 0.335 | USP9X        | -0.329 | RANGAP1      |
| 693 | 0.335 | ZNF223       | -0.328 | CDC5L        |
| 694 | 0.335 | TCTN3        | -0.328 | TBC1D25      |
| 695 | 0.335 | SMC2         | -0.328 | OBSL1        |
| 696 | 0.335 | COQ9         | -0.328 | DNAJC9       |
| 697 | 0.335 | DHH          | -0.328 | CNOT8        |
| 698 | 0.335 | LINC00674    | -0.328 | WNT6         |
| 699 | 0.334 | SMKR1        | -0.328 | TTY7         |
| 700 | 0.334 | FLOT2        | -0.328 | KPNA1        |
| 701 | 0.334 | KIF3A        | -0.328 | GATAD2A      |
| 702 | 0.334 | SULT1A2      | -0.328 | CCDC86       |
| 703 | 0.334 | YIPF4        | -0.327 | BMP8B        |
| 704 | 0.334 | TEF          | -0.327 | PPP2R3C      |
| 705 | 0.334 | ADCY1        | -0.327 | TFB1M        |
| 706 | 0.334 | ZNF711       | -0.327 | TRIM27       |
| 707 | 0.334 | LRR37A       | -0.327 | IFNK         |
| 708 | 0.334 | SYNGR4       | -0.327 | CMSS1        |
| 709 | 0.334 | TRIM32       | -0.327 | NCAN         |
| 710 | 0.334 | RNF103       | -0.327 | CDRT15L2     |
| 711 | 0.334 | LOC100506746 | -0.327 | YPEL2        |
| 712 | 0.334 | CLPTM1L      | -0.327 | DHX30        |
| 713 | 0.334 | LOC101060027 | -0.327 | HOXB-AS5     |
| 714 | 0.334 | FAM102A      | -0.327 | WBSCR27      |
| 715 | 0.334 | ZFR2         | -0.326 | OBP2A        |



|     |       |              |        |              |
|-----|-------|--------------|--------|--------------|
| 716 | 0.333 | TTY2         | -0.326 | MRPL3        |
| 717 | 0.333 | THSD7A       | -0.326 | IL9          |
| 718 | 0.333 | ACLY         | -0.326 | QRSL1        |
| 719 | 0.333 | LOC100505938 | -0.326 | ZNF430       |
| 720 | 0.333 | EGFL7        | -0.326 | LARP1B       |
| 721 | 0.333 | MTX3         | -0.326 | IGHG1        |
| 722 | 0.333 | ABCB6        | -0.326 | LOC101060009 |
| 723 | 0.333 | RAB3C        | -0.326 | CCNT2        |
| 724 | 0.333 | SKI          | -0.326 | SEP15        |
| 725 | 0.333 | METTL9       | -0.326 | HMGA1        |
| 726 | 0.333 | ZNF638       | -0.326 | RAB27A       |
| 727 | 0.333 | NUP98        | -0.326 | PDX1         |
| 728 | 0.332 | AKR1C2       | -0.326 | DENND2A      |
| 729 | 0.332 | C1QTNF3      | -0.326 | GCSHP3       |
| 730 | 0.332 | IFI6         | -0.326 | TEX12        |
| 731 | 0.332 | PAIP1        | -0.326 | AP2B1        |
| 732 | 0.332 | DAW1         | -0.325 | PITPNB       |
| 733 | 0.332 | H2AFY2       | -0.325 | PTGER1       |
| 734 | 0.332 | ALDH7A1      | -0.325 | FBXL6        |
| 735 | 0.332 | PMS2P3       | -0.325 | PDLIM5       |
| 736 | 0.332 | KPNB1        | -0.325 | STX3         |
| 737 | 0.332 | CLDN8        | -0.325 | EBNA1BP2     |
| 738 | 0.332 | GLI1         | -0.325 | HSPA8        |
| 739 | 0.332 | B9D1         | -0.325 | GMPR2        |
| 740 | 0.331 | RSBN1L       | -0.325 | UGT8         |
| 741 | 0.331 | SCN8A        | -0.325 | RNPS1        |
| 742 | 0.331 | GKAP1        | -0.325 | RPL23AP7     |
| 743 | 0.331 | ZNF701       | -0.325 | RSF1         |
| 744 | 0.331 | MST1         | -0.325 | SNX31        |
| 745 | 0.331 | HTRA1        | -0.325 | OPRM1        |
| 746 | 0.331 | TREM1        | -0.324 | HIPK2        |
| 747 | 0.331 | LOC100129935 | -0.324 | ESRRA        |
| 748 | 0.331 | LOC100507367 | -0.324 | FBXO41       |
| 749 | 0.33  | AKIP1        | -0.324 | TEKT2        |
| 750 | 0.33  | LINC00473    | -0.324 | ZMYM6        |
| 751 | 0.33  | USP42        | -0.324 | EIF1AD       |
| 752 | 0.33  | IQCH         | -0.324 | SSBP1        |
| 753 | 0.33  | PDZD4        | -0.324 | HDAC2        |
| 754 | 0.33  | ATMIN        | -0.324 | PEX14        |
| 755 | 0.33  | CCDC53       | -0.324 | ARPC2        |

|     |       |         |        |              |
|-----|-------|---------|--------|--------------|
| 756 | 0.33  | BECN1   | -0.324 | LOC100507373 |
| 757 | 0.33  | GTF2I   | -0.324 | THBS1        |
| 758 | 0.33  | SNX21   | -0.324 | HECA         |
| 759 | 0.33  | GLP1R   | -0.324 | CYP2A7       |
| 760 | 0.33  | DIABLO  | -0.323 | ATAD3B       |
| 761 | 0.33  | PARP6   | -0.323 | TMEM209      |
| 762 | 0.33  | OR2W1   | -0.323 | RPL27A       |
| 763 | 0.33  | SDHA    | -0.323 | PDZD4        |
| 764 | 0.329 | SF3B4   | -0.323 | TNRC6B       |
| 765 | 0.329 | ITPKC   | -0.323 | ZNF337       |
| 766 | 0.329 | CRTAP   | -0.323 | FAM24A       |
| 767 | 0.329 | HCN2    | -0.323 | NME8         |
| 768 | 0.329 | SFSWAP  | -0.323 | DLEU2        |
| 769 | 0.329 | MAR7    | -0.323 | SMG1         |
| 770 | 0.329 | ZNF501  | -0.323 | PRKCSH       |
| 771 | 0.329 | UBE2B   | -0.323 | UBE2G2       |
| 772 | 0.329 | EPHX2   | -0.323 | DEFA1        |
| 773 | 0.329 | FAM110C | -0.323 | GRIN2D       |
| 774 | 0.329 | LRRC73  | -0.323 | FCRL2        |
| 775 | 0.328 | DYNLRB2 | -0.323 | HAUS2        |
| 776 | 0.328 | SLC11A2 | -0.323 | KCNA7        |
| 777 | 0.328 | KLK2    | -0.323 | PABPC1       |
| 778 | 0.328 | TNKS    | -0.322 | PXDNL        |
| 779 | 0.328 | TRMT1L  | -0.322 | PTCH2        |
| 780 | 0.328 | RNFT2   | -0.322 | FAM43A       |
| 781 | 0.328 | NAP1L2  | -0.322 | ZNF75A       |
| 782 | 0.328 | CDC14A  | -0.322 | A1BG-AS1     |
| 783 | 0.328 | TOR3A   | -0.322 | MAGI1        |
| 784 | 0.328 | ABCC3   | -0.322 | RNF182       |
| 785 | 0.328 | SPZ1    | -0.322 | CHORDC1      |
| 786 | 0.328 | ACER3   | -0.322 | LOC100506088 |
| 787 | 0.328 | PTPRN   | -0.322 | CHCHD7       |
| 788 | 0.328 | SLC7A11 | -0.321 | FKBP6        |
| 789 | 0.327 | PLCD4   | -0.321 | KCNJ5        |
| 790 | 0.327 | STRADA  | -0.321 | PIGA         |
| 791 | 0.327 | CIAPIN1 | -0.321 | KRT75        |
| 792 | 0.327 | RBM24   | -0.321 | CPSF1        |
| 793 | 0.327 | ARL3    | -0.321 | POLRMT       |
| 794 | 0.327 | PTRHD1  | -0.321 | C17orf104    |
| 795 | 0.327 | PSMD7   | -0.321 | PKNOX1       |

|     |       |          |        |          |
|-----|-------|----------|--------|----------|
| 796 | 0.327 | CHD1L    | -0.321 | MIS18BP1 |
| 797 | 0.327 | AKTIP    | -0.321 | GLYCTK   |
| 798 | 0.327 | ERMAP    | -0.321 | ELOF1    |
| 799 | 0.327 | ATP6V1E2 | -0.32  | EXTL3    |
| 800 | 0.327 | PRKAA1   | -0.32  | RBM44    |
| 801 | 0.327 | PDIA6    | -0.32  | PRDM2    |
| 802 | 0.327 | PIP4K2C  | -0.32  | TRIM4    |
| 803 | 0.326 | ANKRD54  | -0.32  | ACRBP    |
| 804 | 0.326 | AHCYL1   | -0.32  | MICAL3   |
| 805 | 0.326 | HAUS3    | -0.32  | PLEK     |
| 806 | 0.326 | ACACA    | -0.32  | PPP6R1   |
| 807 |       |          | -0.32  | PPP4R1   |
| 808 |       |          | -0.32  | FUOM     |
| 809 |       |          | -0.32  | ACTR3    |
| 810 |       |          | -0.319 | ENAM     |
| 811 |       |          | -0.319 | NUDT4    |
| 812 |       |          | -0.319 | C2CD4A   |
| 813 |       |          | -0.319 | EXTL2    |
| 814 |       |          | -0.319 | SMIM1    |
| 815 |       |          | -0.319 | ETV6     |
| 816 |       |          | -0.319 | HTR4     |
| 817 |       |          | -0.319 | PPP1R12C |
| 818 |       |          | -0.319 | GLMN     |
| 819 |       |          | -0.319 | LSM4     |
| 820 |       |          | -0.319 | KLF4     |
| 821 |       |          | -0.319 | FCRL4    |
| 822 |       |          | -0.318 | TCP11    |
| 823 |       |          | -0.318 | UBA52    |
| 824 |       |          | -0.318 | EEF2     |
| 825 |       |          | -0.318 | SP8      |
| 826 |       |          | -0.318 | SLC41A3  |
| 827 |       |          | -0.318 | L3MBTL2  |
| 828 |       |          | -0.318 | FAM209A  |
| 829 |       |          | -0.318 | PPIH     |
| 830 |       |          | -0.318 | MRPL37   |
| 831 |       |          | -0.318 | MROH1    |
| 832 |       |          | -0.318 | MLEC     |
| 833 |       |          | -0.318 | PTPN4    |
| 834 |       |          | -0.318 | C1QA     |
| 835 |       |          | -0.318 | LOC90499 |

|     |  |  |        |            |
|-----|--|--|--------|------------|
| 836 |  |  | -0.318 | ATG5       |
| 837 |  |  | -0.318 | CCDC61     |
| 838 |  |  | -0.318 | AQPEP      |
| 839 |  |  | -0.318 | REXO4      |
| 840 |  |  | -0.318 | LILRB2     |
| 841 |  |  | -0.317 | GPR171     |
| 842 |  |  | -0.317 | C16orf95   |
| 843 |  |  | -0.317 | HSPA6      |
| 844 |  |  | -0.317 | HMGCLL1    |
| 845 |  |  | -0.317 | FAM194A    |
| 846 |  |  | -0.317 | FLJ43663   |
| 847 |  |  | -0.317 | VPS13A-AS1 |
| 848 |  |  | -0.317 | STX16      |
| 849 |  |  | -0.317 | DGAT1      |

**Table S5.** NCI-60/COMPARE analysis: summary of SLC genes whose mRNA expression is positively or negatively correlated with chemosensitivity to compound 1 (logGI<sub>50</sub>)

| Gene                  | Pearson's <i>R</i> <sup>a</sup> | Function                                                 | <i>P</i> value <sup>b</sup> |
|-----------------------|---------------------------------|----------------------------------------------------------|-----------------------------|
| <i>SLC11A2</i>        | 0.328                           | H <sup>+</sup> -coupled Cu and M <sup>2+</sup> symporter | *                           |
| <i>SLC12A4</i>        | 0.352                           | K <sup>+</sup> /Cl <sup>-</sup> coupled transporter      | **                          |
| <i>SLC16A1</i>        | 0.327                           | lactate/pyruvate transporter                             | *                           |
| <i>SLC16A4</i>        | 0.358                           | monocarboxylic acid transporter                          | **                          |
| <i>SLC17A9</i>        | -0.366                          | ATP/mononucleotide vesicular uptake                      | **                          |
| <i>SLC22A17</i>       | 0.374                           | multi-specific cation transporter (brain)                | **                          |
| <i>SLC22A5</i>        | 0.38                            | carnitine transporter                                    | **                          |
| <i>SLC22A7</i>        | -0.397                          | multi-specific anion transporter                         | **                          |
| <i>SLC24A2</i>        | -0.427                          | Ca <sup>2+</sup> /cation antiporter                      | ***                         |
| <i>SLC25A32</i>       | -0.318                          | mitochondrial folate transporter                         | *                           |
| <i>SLC26A8</i>        | -0.36                           | anion transporter                                        | **                          |
| <i>SLC27A7</i>        | -0.352                          | fatty acid transporter                                   | **                          |
| <i>SLC2A9</i>         | -0.374                          | uric acid transporter GLUT9                              | **                          |
| <i>SLC30A1</i>        | 0.371                           | cation transporter                                       | **                          |
| <i>SLC30A5</i>        | 0.404                           | Zn <sup>2+</sup> transporter                             | **                          |
| <i>SLC35E3</i>        | 0.419                           | putative transporter                                     | **                          |
| <i>SLC35F6</i>        | 0.353                           | carbohydrate/H <sup>+</sup> symporter                    | **                          |
| <i>SLC38A7</i>        | 0.362                           | Na <sup>+</sup> coupled amino acid transporter           | **                          |
| <i>SLC39A8</i>        | 0.381                           | Zn <sup>2+</sup> and Cd <sup>2+</sup> transporter        | **                          |
| <i>SLC3A2</i>         | 0.392                           | amino acid transporter                                   | **                          |
| <i>SLC41A3</i>        | -0.318                          | cation transporter                                       | *                           |
| <i>SLC43A3</i>        | -0.415                          | putative transporter                                     | **                          |
| <b><i>SLC47A1</i></b> | <b>0.692</b>                    | <b>H<sup>+</sup>-coupled organic cation antiporter</b>   | <b>*****</b>                |
| <i>SLC48A1</i>        | 0.38                            | heme transporter                                         | **                          |
| <i>SLC51B</i>         | 0.393                           | bile acid transporter                                    | **                          |
| <i>SLC6A19</i>        | -0.38                           | Na <sup>+</sup> dependent neutral amino acid transporter | **                          |
| <i>SLC6A2</i>         | 0.371                           | Na <sup>+</sup> /neurotransmitter symporter              | **                          |
| <i>SLC7A11</i>        | 0.328                           | anionic amino acid transporter                           | *                           |
| <i>SLC8A1</i>         | 0.364                           | Na <sup>+</sup> /Ca <sup>2+</sup> exchanger              | **                          |
| <i>SLCO4A1</i>        | -0.328                          | organic anion transporter                                | *                           |

<sup>a</sup> *N* = 58. <sup>b</sup> \* *P* < 0.05; \*\* *P* < 0.01; \*\*\* *P* < 0.001; \*\*\*\*\* *P* < 0.00001.

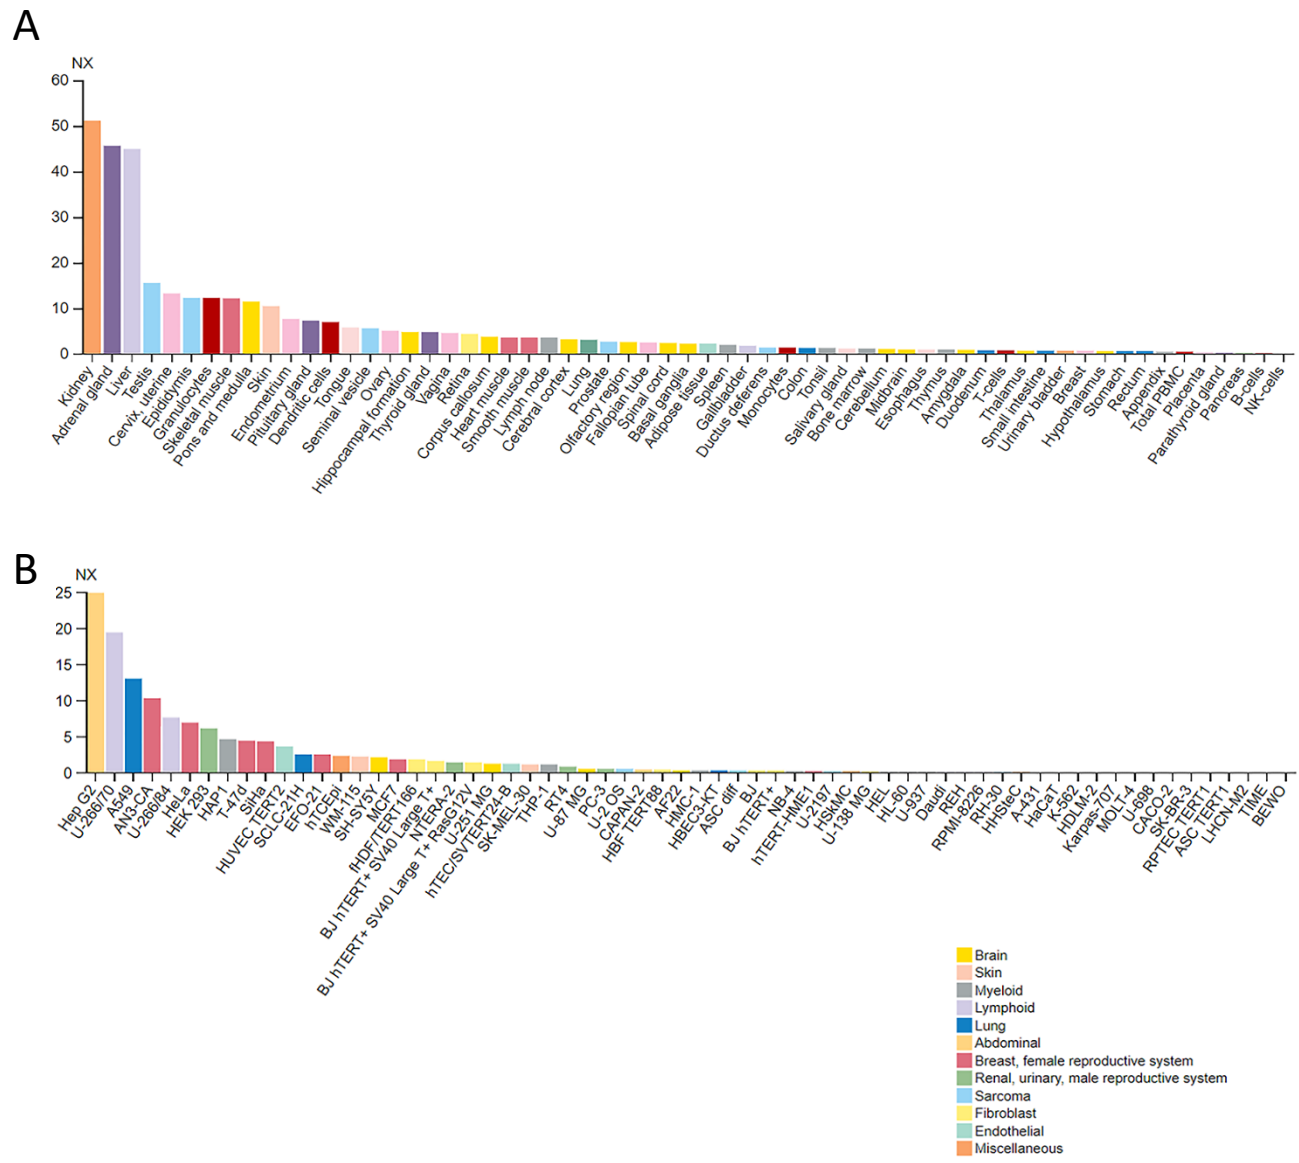

**Figure S2.** Expression of hMATE1 (*SLC47A1*) in normal human tissue (A) and in cancer cells (B); The Human Protein Atlas, version 19.1, 12/2019, [www.proteinatlas.org](http://www.proteinatlas.org).

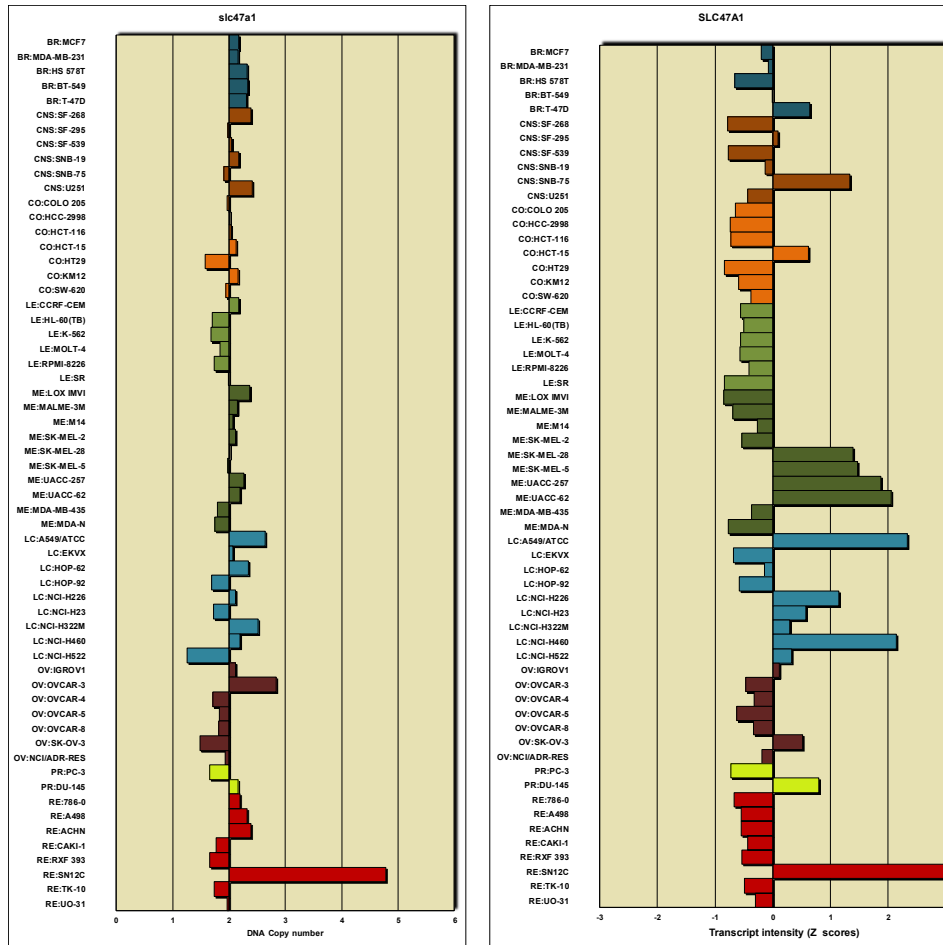

**Figure S3.** *SLC47A1* gene copy numbers (left) and transcript levels (right) in NCI-60 (NCI CellMiner analysis tool, database version 2.2)

**Table S6.** Summary of top 10 overlaps<sup>a</sup> between gene ontology (GO) gene sets of the Molecular Signatures Database (MSigDB)<sup>b</sup> and the input gene set<sup>c</sup> derived from NCI-60 COMPARE correlation between activity of compound **1** (GI<sub>50</sub>) and gene transcript levels for *SLC47A1*

|          | <b>MSigDB Gene Set</b>                 | <i>K</i> <sup>d</sup> | <b>Description</b>                                                                                                                                                                                                                                                                                               | <i>k</i> <sup>e</sup> | <i>k/K</i> | <i>p</i> -value <sup>f</sup> | <b>FDR <i>q</i>-value</b> |
|----------|----------------------------------------|-----------------------|------------------------------------------------------------------------------------------------------------------------------------------------------------------------------------------------------------------------------------------------------------------------------------------------------------------|-----------------------|------------|------------------------------|---------------------------|
| <b>1</b> | GO_INTRACELLULAR_TRANSPORT             | 1825                  | The directed movement of substances within a cell. [GOC:ai]                                                                                                                                                                                                                                                      | 101                   | 0.056      | 2.07 e <sup>-19</sup>        | 2.07 e <sup>-15</sup>     |
| <b>2</b> | GO_CELLULAR_MACROMOLECULE_LOCALIZATION | 1897                  | Any process in which a macromolecule is transported to, and/or maintained in, a specific location at the level of a cell. Localization at the cellular level encompasses movement within the cell, from within the cell to the cell surface, or from one location to another at the surface of a cell. [GOC:mah] | 102                   | 0.054      | 1.01 e <sup>-18</sup>        | 5.02 e <sup>-15</sup>     |
| <b>3</b> | GO_CELL_PROJECTION_PART                | 1440                  | Any constituent part of a cell projection, a prolongation or process extending from a cell, e.g. a flagellum or axon. [GOC:jl]                                                                                                                                                                                   | 85                    | 0.059      | 4.35 e <sup>-18</sup>        | 1.45 e <sup>-14</sup>     |
| <b>4</b> | GO_WHOLE_MEMBRANE                      | 1653                  | Any lipid bilayer that completely encloses some structure, and all the proteins embedded in it or attached to it. Examples include the plasma membrane and most organelle membranes. [GOC:dos]                                                                                                                   | 91                    | 0.055      | 2.14 e <sup>-17</sup>        | 5.34 e <sup>-14</sup>     |
| <b>5</b> | GO_INTRACELLULAR_PROTEIN_TRANSPORT     | 1164                  | The directed movement of proteins in a cell, including the movement of proteins between specific compartments or structures within a cell, such as organelles of a eukaryotic cell. [GOC:mah]                                                                                                                    | 73                    | 0.063      | 4.97 e <sup>-17</sup>        | 9.93 e <sup>-14</sup>     |
| <b>6</b> | GO_PROTEOLYSIS                         | 1762                  | The hydrolysis of proteins into smaller polypeptides and/or amino acids by cleavage of their peptide bonds. [GOC:bf, GOC:mah]                                                                                                                                                                                    | 93                    | 0.053      | 1.3 e <sup>-16</sup>         | 2.16 e <sup>-13</sup>     |



|           |                                 |      |                                                                                                                                                                                                                                                                                                                                                            |    |       |                       |                       |
|-----------|---------------------------------|------|------------------------------------------------------------------------------------------------------------------------------------------------------------------------------------------------------------------------------------------------------------------------------------------------------------------------------------------------------------|----|-------|-----------------------|-----------------------|
| <b>7</b>  | GO_NEURON_PART                  | 1715 | Any constituent part of a neuron, the basic cellular unit of nervous tissue. A typical neuron consists of a cell body (often called the soma), an axon, and dendrites. Their purpose is to receive, conduct, and transmit impulses in the nervous system. [GOC:pr, <a href="http://en.wikipedia.org/wiki/Neuron">http://en.wikipedia.org/wiki/Neuron</a> ] | 91 | 0.053 | 2.07 e <sup>-16</sup> | 2.95 e <sup>-13</sup> |
| <b>8</b>  | GO_CELL_PROJECTION_ORGANIZATION | 1512 | A process that is carried out at the cellular level which results in the assembly, arrangement of constituent parts, or disassembly of a prolongation or process extending from a cell, e.g. a flagellum or axon. [GOC:jl, GOC:mah, <a href="http://www.cogsci.princeton.edu/~wn/">http://www.cogsci.princeton.edu/~wn/</a> ]                              | 84 | 0.056 | 2.43 e <sup>-16</sup> | 3.04 e <sup>-13</sup> |
| <b>9</b>  | GO_RIBONUCLEOTIDE_BINDING       | 1891 | Interacting selectively and non-covalently with a ribonucleotide, any compound consisting of a ribonucleoside that is esterified with (ortho)phosphate or an oligophosphate at any hydroxyl group on the ribose moiety. [GOC:mah]                                                                                                                          | 95 | 0.050 | 1.29 e <sup>-15</sup> | 1.43 e <sup>-12</sup> |
| <b>10</b> | GO_MICROTUBULE_BASED_PROCESS    | 734  | Any cellular process that depends upon or alters the microtubule cytoskeleton, that part of the cytoskeleton comprising microtubules and their associated proteins. [GOC:mah]                                                                                                                                                                              | 53 | 0.072 | 4.34 e <sup>-15</sup> | 4.34 e <sup>-12</sup> |

<sup>a</sup> Number of genes in comparison (*n*): 785, number of genes in universe (*N*): 38055. <sup>b</sup> MSigDB database v6.2, updated July 2018; GSEA/MSigDB website v6.3, released 01/2018 by the Broad Institute Inc. <sup>c</sup> See Table S4. Number of positively correlated genes: 806, *P* < 0.05. <sup>d</sup> Number of genes in gene set. <sup>e</sup> Number of genes in overlap. <sup>f</sup> For hypergeometric distribution.

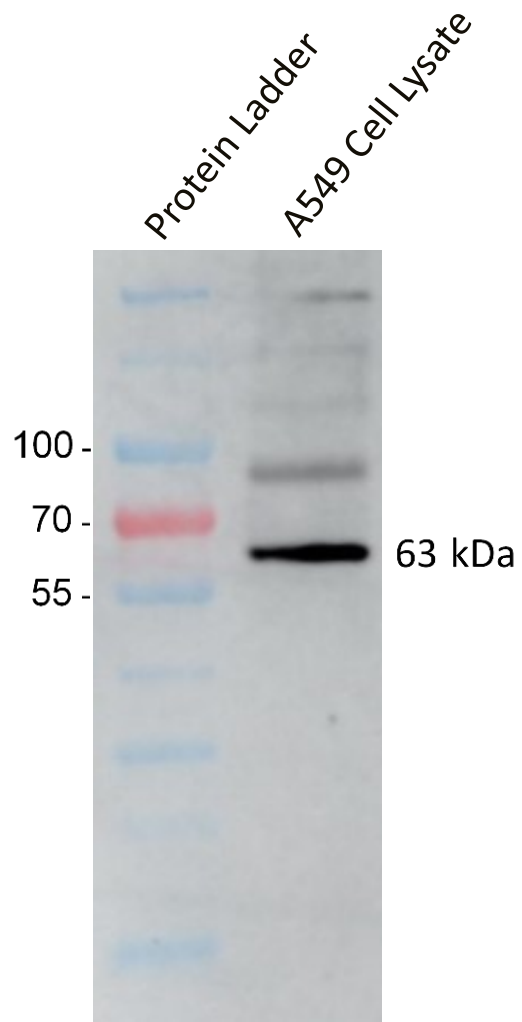

**Figure S4.** Western blot analysis of A549 cell lysate for hMATE1 expression. The blot shows a band consistent with the 63-kDa full-length, 586-amino acid protein (The Human Protein Atlas, version 19.1, 12/2019, [www.proteinatlas.org](http://www.proteinatlas.org)).

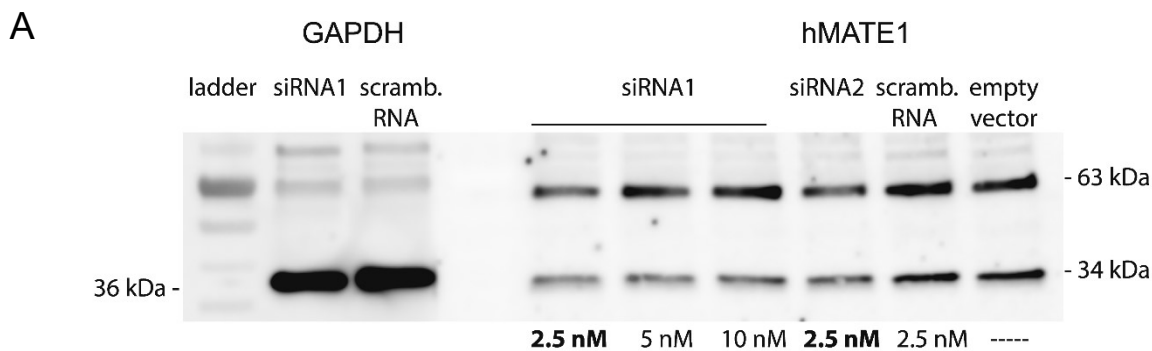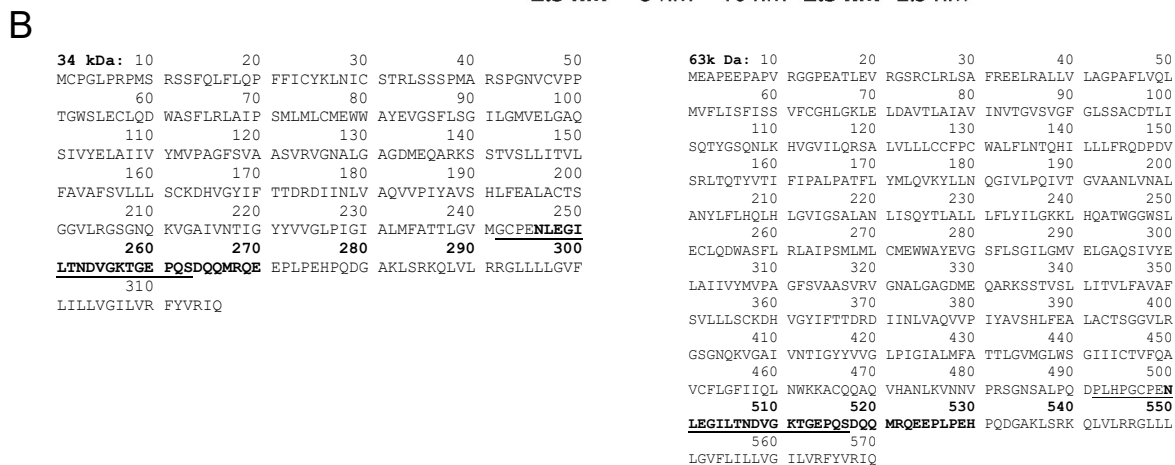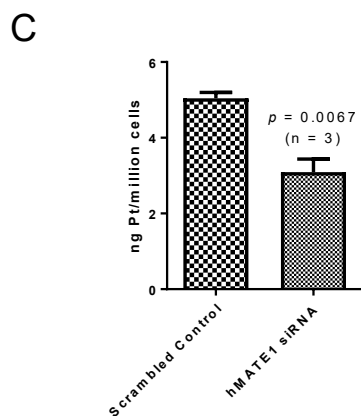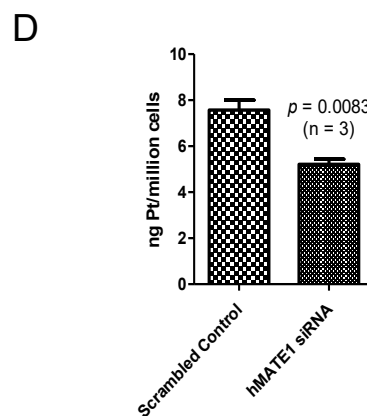

**Figure S5.** (A) Western blot for optimized RNAi conditions. The full-length protein (63 kDa) and the 34-kDa splice variant are observed. Transfection with 2.5 nM of both siRNA1 and siRNA2 provided the best knockdown efficiency relative to scrambled control and empty vector (lipofectamine). The GAPDH loading control is also shown. The gel image (30 sec. exposure) was contrast enhanced but otherwise not altered. (B) Rabbit-anti-human hMATE1 antibodies used in this study and aligned amino-acid sequences of the 63-kDa full-length protein and the 34-kDa splice variant (NCBI). Specific antibodies/epitopes: underlined: Thermo Fisher PA5-25272 and AVIVA OAAB02770 (residues 492-519, underlined), based on full length protein); **bold**: Abcam, ab104016 (residues 500-530, **bold**, based on full length protein). (C,D) Results for two additional drug uptake experiments after hMATE1 (*SLC47A1*) knockdown, quantified by ICP-MS, showing reduction in uptake of compound 1 by 39% ( $p < 0.01$ ) and 32% ( $p < 0.01$ ), respectively.

**Table S7.** Pattern comparisons for *SLC47A1* expression in NCI CellMiner.

**CellMiner Address:** <https://discover.nci.nih.gov/cellminer/>  
**05-14-2019** Pattern Comparison  
**CellMiner Database Version:** 2.2  
**Human Genome Version:** HG 19  
**Date:** 04-17-2019  
**Input data:** **SLC47A1**  
**Number of genes:** 25683  
**Number of drugs:** 21738  
**Number of miRNA:** 361

**Deposited as Excel spreadsheet**

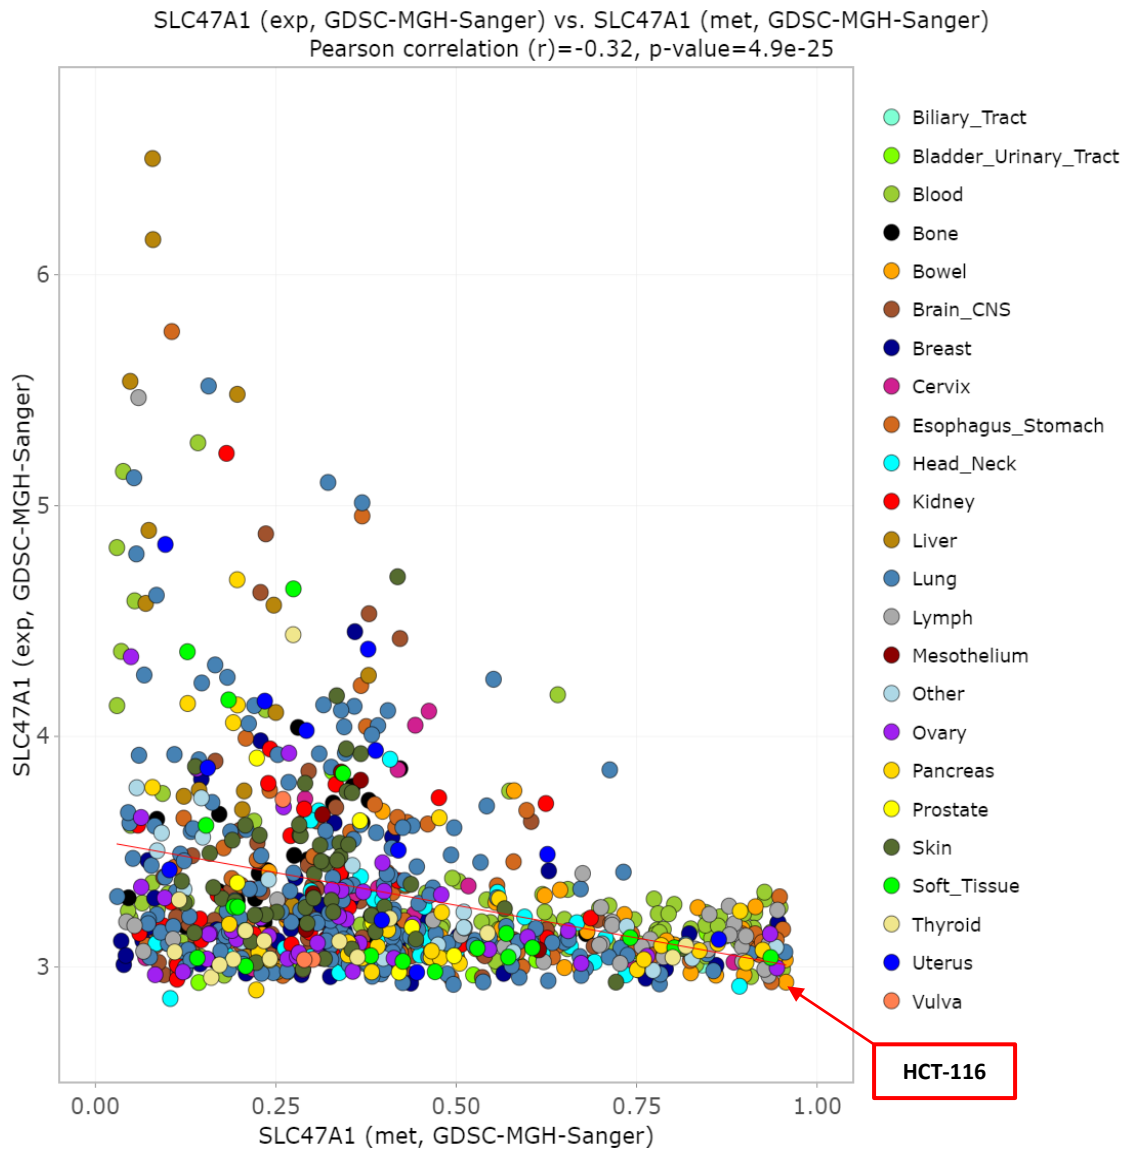

**Figure S6.** A highly significant correlation ( $R = -0.32$ ,  $p = 4.9 \times 10^{-25}$ ) between CPI methylation status and expression levels of the *SLC47A1* gene is observed in 963 cancer cell lines of the Genomics of Drug Sensitivity in Cancer (GDSC) database (CellMinerCDB, version 1.1, discover.nci.nih.gov/cellmineradb). The data point for the colorectal cancer cell line HCT-116 used in this study is highlighted.

**Table S8.** Summary of significant ( $p < 0.05$ ) correlations identified between CGI methylation status and expression levels of the *SLC47A1* gene in 963 cancer cell lines<sup>a</sup> of different tissues of origin and cell types

| <b>Cell Line Origin</b>    | <b>Pearson's <i>R</i></b> | <b><i>P</i> value</b>                  |
|----------------------------|---------------------------|----------------------------------------|
| Multiple Myeloma           | -0.55                     | 0.028                                  |
| Colon                      | -0.33                     | 0.025                                  |
| Esophagus/Stomach          | -0.41                     | $7.6 \times 10^{-4}$                   |
| Liver                      | -0.56                     | 0.02                                   |
| <b>Lung</b>                | <b>-0.32</b>              | <b><math>8.2 \times 10^{-6}</math></b> |
| <b>NSCLC</b>               | <b>-0.43</b>              | <b><math>1.1 \times 10^{-5}</math></b> |
| <b>Lung Adenocarcinoma</b> | <b>-0.47</b>              | <b><math>4.7 \times 10^{-4}</math></b> |
| Ovaries                    | -0.32                     | 0.032                                  |
| Pancreas                   | -0.47                     | $8.1 \times 10^{-3}$                   |
| Epithelial                 | -0.16                     | $4.4 \times 10^{-3}$                   |
| Epithelial–Mesenchymal     | -0.43                     | $2.7 \times 10^{-7}$                   |
| Mesenchymal                | -0.23                     | $1.3 \times 10^{-5}$                   |

<sup>a</sup> Genomics of Drug Sensitivity in Cancer (GDSC) database (CellMinerCDB, version 1.1, [discover.nci.nih.gov/cellminerfdb](http://discover.nci.nih.gov/cellminerfdb)).

**Table S9.** Summary of correlations observed for chemosensitivity and omics data for compound **1**.

| Data in Comparison              |                                 | Pearson's <i>R</i>  | <i>P</i> value                |
|---------------------------------|---------------------------------|---------------------|-------------------------------|
| NCI-60, logGI <sub>50</sub>     | <i>SLC47A1</i> transcript level | 0.692 <sup>a</sup>  | < .00001 (*****) <sup>a</sup> |
| NCI-60, logGI <sub>50</sub>     | <i>DNMT1</i> transcript level   | -0.378 <sup>a</sup> | 0.0034 (**) <sup>a</sup>      |
| <i>SLC47A1</i> transcript level | <i>SLC47A1</i> CGI methylation  | -0.416 <sup>b</sup> | < 0.001 (***) <sup>b</sup>    |
| <i>SLC47A1</i> transcript level | <i>SLC47A1</i> gene copy number | 0.398 <sup>b</sup>  | < 0.001 (***) <sup>b</sup>    |
| <i>SLC47A1</i> transcript level | <i>EZH2</i> transcript level    | -0.289 <sup>b</sup> | 0.025 (*) <sup>b</sup>        |
| <i>SLC47A1</i> CGI methylation  | <i>DNMT1</i> transcript level   | 0.311 <sup>b</sup>  | 0.015 (*) <sup>b</sup>        |
| <i>EZH2</i> transcript level    | <i>DNMT1</i> transcript level   | 0.479 <sup>b</sup>  | < 0.001 (***) <sup>b</sup>    |

<sup>a</sup> NCI COMPARE analysis, *n* = 58. <sup>b</sup> NCI CellMiner analysis tool, database version 2.2, *n* = 60.

**Table S10.** Summary of top 10 overlaps<sup>a</sup> between all gene sets of the molecular signatures database (MSigDB)<sup>b</sup> and the input gene set<sup>c</sup> of hypermethylated genes negatively correlated with *SLC47A1* expression.

|          | <b>MSigDB Gene Set</b>                       | <b>k<sup>d</sup></b> | <b>Description</b>                                                                                                                                                                                                                                                              | <b>k<sup>e</sup></b> | <b>k/K</b> | <b>p-value<sup>f</sup></b> | <b>FDR q-value</b>    |
|----------|----------------------------------------------|----------------------|---------------------------------------------------------------------------------------------------------------------------------------------------------------------------------------------------------------------------------------------------------------------------------|----------------------|------------|----------------------------|-----------------------|
| <b>1</b> | BENPORATH_ES_WITH_H3K27ME3                   | 1118                 | Set 'H3K27 bound': genes possessing the trimethylated H3K27 (H3K27me3) mark in their promoters in human embryonic stem cells, as identified by CHIP on chip.                                                                                                                    | 115                  | 0.1029     | 1.21 e <sup>-92</sup>      | 2.15 e <sup>-88</sup> |
| <b>2</b> | BENPORATH_EED_TARGETS                        | 1062                 | Set 'Eed targets': genes identified by CHIP on chip as targets of the Polycomb protein EED [GeneID=8726] in human embryonic stem cells.                                                                                                                                         | 111                  | 0.1045     | 5.70 e <sup>-90</sup>      | 5.08 e <sup>-86</sup> |
| <b>3</b> | MIKKELSEN_MEF_HCP_WITH_H3K27ME3              | 590                  | Genes with high-CpG-density promoters (HCP) bearing histone H3 trimethylation mark at K27 (H3K27me3) in MEF cells (embryonic fibroblast).                                                                                                                                       | 91                   | 0.1542     | 1.23 e <sup>-88</sup>      | 7.28 e <sup>-85</sup> |
| <b>4</b> | BENPORATH_SUZ12_TARGETS                      | 1038                 | Set 'Suz12 targets': genes identified by CHIP on chip as targets of the Polycomb protein SUZ12 [GeneID=23512] in human embryonic stem cells.                                                                                                                                    | 108                  | 0.104      | 3.62 e <sup>-87</sup>      | 1.61 e <sup>-83</sup> |
| <b>5</b> | BENPORATH_PRC2_TARGETS                       | 652                  | Set 'PRC2 targets': Polycomb Repression Complex 2 (PRC) targets; identified by CHIP on chip on human embryonic stem cells as genes that: possess the trimethylated H3K27 mark in their promoters and are bound by SUZ12 [GeneID=23512] and EED [GeneID=8726] Polycomb proteins. | 75                   | 0.115      | 7.73 e <sup>-63</sup>      | 2.75 e <sup>-59</sup> |
| <b>6</b> | MEISSNER_BRAIN_HCP_WITH_H3K4ME3_AND_H3K27ME3 | 1069                 | Genes with high-CpG-density promoters (HCP) bearing histone H3 dimethylation at K4 (H3K4me2) and trimethylation at K27 (H3K27me3) in brain.                                                                                                                                     | 89                   | 0.0833     | 1.21 e <sup>-62</sup>      | 3.60 e <sup>-59</sup> |



|           |                                                            |      |                                                                                                                                                                                                                                                                                                     |     |        |                       |                       |
|-----------|------------------------------------------------------------|------|-----------------------------------------------------------------------------------------------------------------------------------------------------------------------------------------------------------------------------------------------------------------------------------------------------|-----|--------|-----------------------|-----------------------|
| <b>7</b>  | GO_INTRINSI<br>C_COMPONE<br>NT_OF_PLAS<br>MA_MEMBR<br>ANE  | 1649 | The component of the plasma membrane consisting of the gene products and protein complexes having either part of their peptide sequence embedded in the hydrophobic region of the membrane or some other covalently attached group such as a GPI anchor that is similarly embedded in the membrane. | 104 | 0.0631 | 7.53 e <sup>-62</sup> | 1.92 e <sup>-58</sup> |
| <b>8</b>  | MEISSNER_N<br>PC_HCP_WIT<br>H_H3K4ME2<br>_AND_H3K27<br>ME3 | 349  | Genes with high-CpG-density promoters (HCP) bearing histone H3 dimethylation mark at K4 (H3K4me2) and trimethylation mark at K27 (H3K27me3) in neural precursor cells (NPC).                                                                                                                        | 60  | 0.1719 | 7.26 e <sup>-61</sup> | 1.62 e <sup>-57</sup> |
| <b>9</b>  | MIKKELSEN_<br>NPC_HCP_WI<br>TH_H3K27M<br>E3                | 341  | Genes with high-CpG-density promoters (HCP) bearing histone H3 trimethylation mark at K27 (H3K27me3) in neural progenitor cells (NPC).                                                                                                                                                              | 58  | 0.1701 | 1.54 e <sup>-58</sup> | 3.04 e <sup>-55</sup> |
| <b>10</b> | MIKKELSEN_<br>MCV6_HCP_<br>WITH_H3K27<br>ME3               | 435  | Genes with high-CpG-density promoters (HCP) bearing the tri-methylation mark at H3K27 (H3K27me3) in MCV6 cells (embryonic fibroblasts trapped in a differentiated state).                                                                                                                           | 60  | 0.1379 | 6.82 e <sup>-55</sup> | 1.21 e <sup>-51</sup> |

<sup>a</sup> Number of genes in comparison (*n*): 402, number of genes in universe (*N*): 38055. <sup>b</sup> MSigDB database v6.2, updated July 2018; GSEA/MSigDB website v6.3, released 01/2018 by the Broad Institute Inc. <sup>c</sup> See Table S7. Number of negatively correlated genes: 452, *P* < 0.05. <sup>d</sup> Number of genes in gene set. <sup>e</sup> Number of genes in overlap. <sup>f</sup> For hypergeometric distribution.

**A**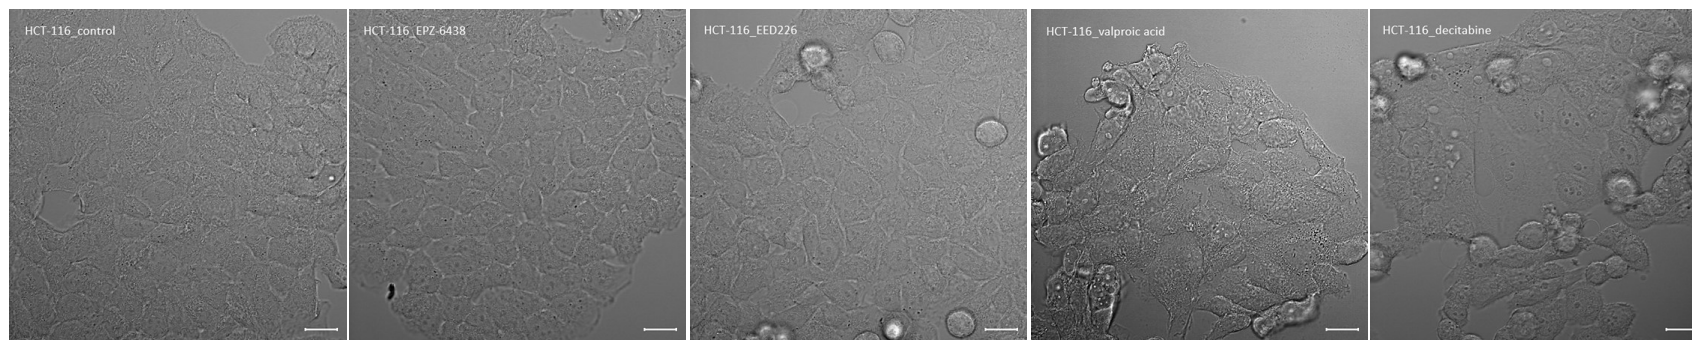**B**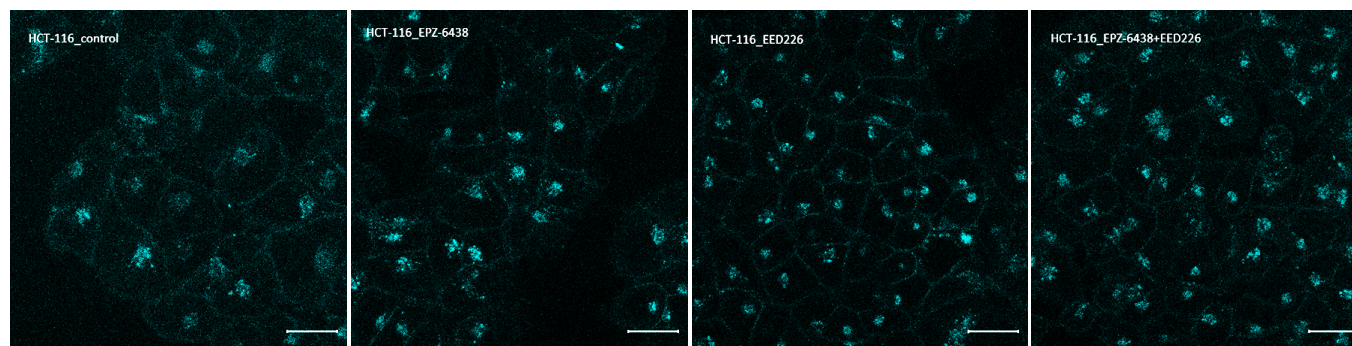

**Figure S7.** Pre-screening of HCT-116 colon cancer cells for the effects of epigenetic drugs on cell viability and accumulation of compound **1**. Cells were treated with single drugs or combinations of up to four epigenetic drugs at 2.5  $\mu$ M for 72 hours. Cells were then fixed and imaged in the bright-field and blue fluorescence channels. (A) Bright-field images show intact monolayers of viable cells after incubation with EPZ-6438 and EED226 similar to DMSO-treated cells (control) but show changes in morphology and cell death after treatment with valproic acid and decitabine (only selected images of single treatments are shown). (B) Treatment at 2.5  $\mu$ M EPZ-6438 and EED226, or a combination of the two drugs, for 72 hours leads to enhanced cellular accumulation of compound **1**, based on increased acridine-associated blue fluorescence localized to regions previously identified as vesicular structures (see the main text). Scale bars in (A) and (B) are 20  $\mu$ m.

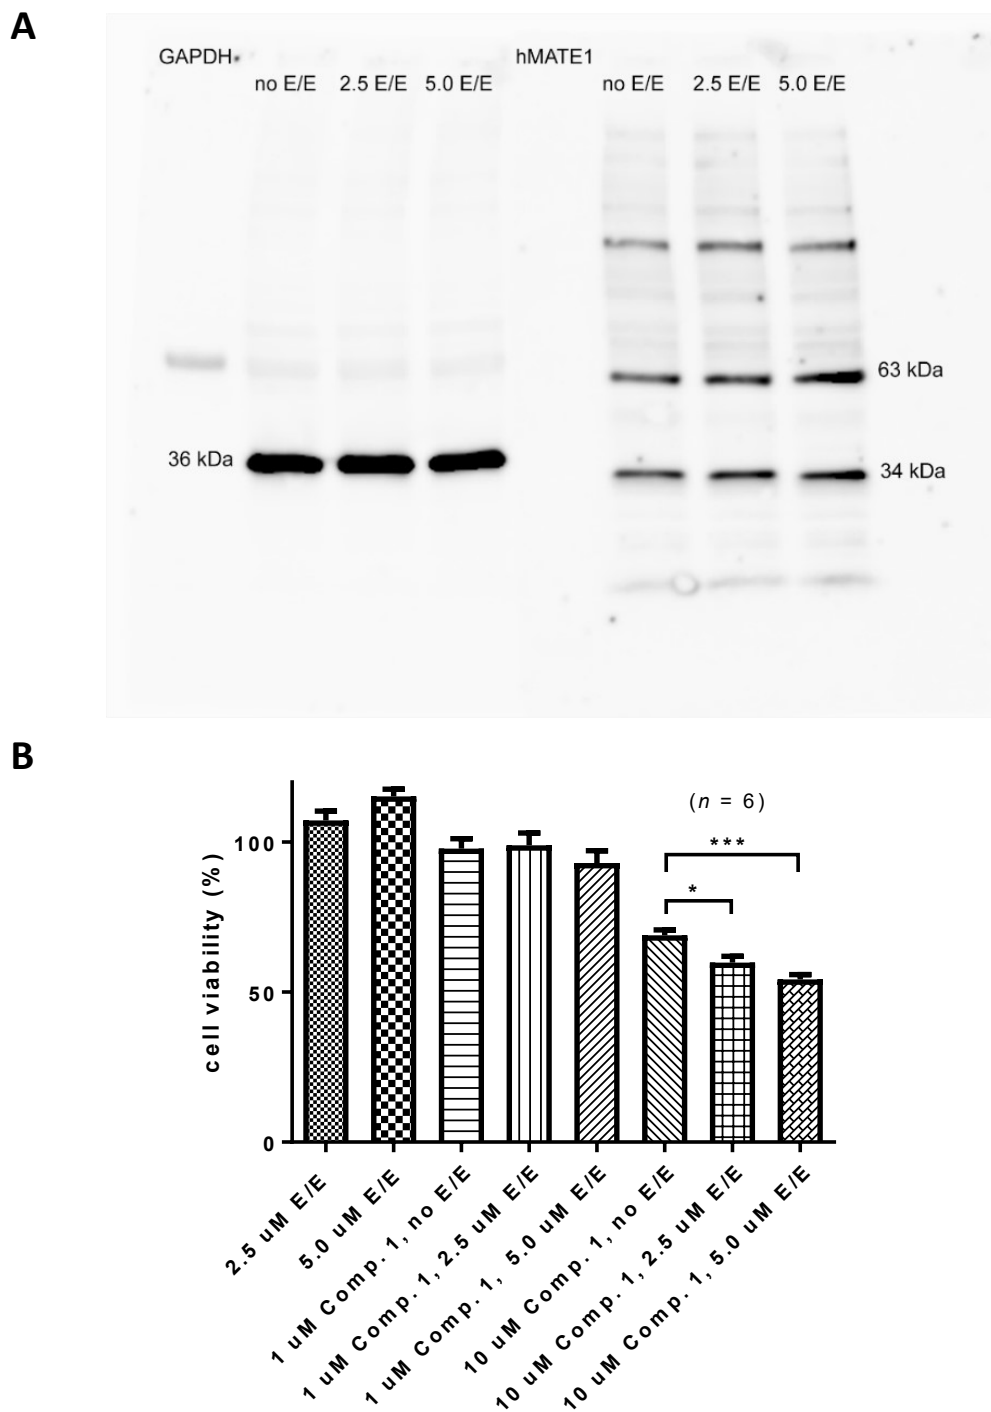

**Figure S8.** (A) Western blot analysis of hMATE1 protein in HCT-116 cell lysates pre-treated with a combination of EPZ-6438 and EED226 (E/E). Bands for GAPDH (36 kDa), full-length hMATE1 (63 kDa), and a splice variant of hMATE1 containing the antibody epitope (34 kDa) are labeled. (B) Cell proliferation assay for HCT-116 cells pre-exposed to 2.5  $\mu$ M or 5  $\mu$ M E/E for 72 hours and subsequently treated with 1  $\mu$ M or 10  $\mu$ M compound **1** for another 72 hours. A pronounced decrease in cell viability was observed at higher doses of epigenetic drugs. The data is presented as the mean  $\pm$  S.E.M. for an assay performed in sextuplicate (\*,  $p < 0.05$ ; \*\*\*,  $p < 0.001$ ; one-way ANOVA with post hoc test).

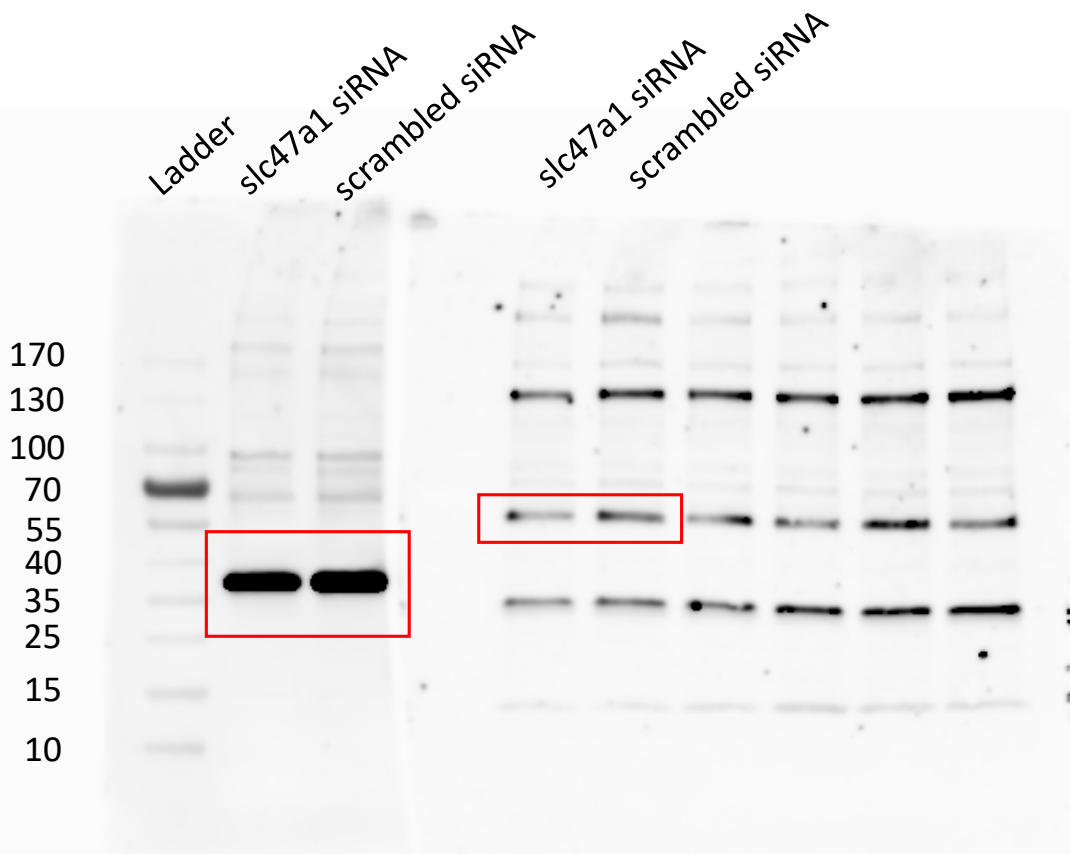

**Figure S9.** Full-length, uncropped/unprocessed image of Western blots presented in Fig. 3a in the main text for GAPDH protein (control, left) and hMATE1 protein (right). Exposure time: 3 min. Cropped sections used in Fig. 3a are highlighted with red boxes. To maintain a consistent presentation throughout the paper, the blot images in Fig. 3a have been flipped horizontally.

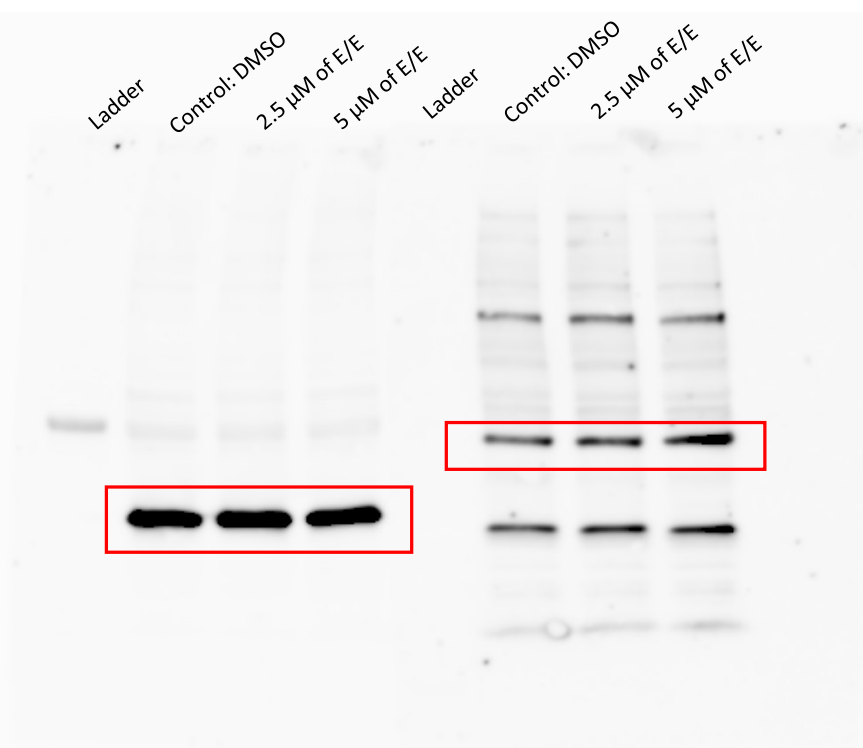

**Figure S10.** Full-length, uncropped/unprocessed image of Western blots presented in Fig. 4f in the main text for GAPDH protein (control, left) and hMATE1 protein (right). Exposure time: 20 sec. Cropped sections used in Fig. 4f are highlighted with red boxes.

## Assay Layouts

**AL1.** Uptake of compound **1** into HCT-116 cells after sensitization with epigenetic drugs<sup>a</sup> monitored by confocal fluorescence microscopy (pre-screening).

|         |     |         |        |             |                 |
|---------|-----|---------|--------|-------------|-----------------|
| Control | VA  | VA EPZ  | VA     | VA EED EPZ  | VAL DEC EPZ     |
| Control | VA  | EPZ     | EPZ VA | EPZ EED DEC | EPZ DEC VAL EED |
| Control | EED | EED EPZ | EED VA | EED         | EED DEC EPZ     |
| Control | DEC | DEC EPZ | DEC VA | DEC EED     | DEC             |

<sup>a</sup> VA, valproic acid; DEC, decitabine; EPZ, EPZ-6438; EED, EED226.

**AL2.** Uptake of compound **1** into HCT-116 cells after sensitization with EPZ-6438, EED226, and a combination of both drugs at escalating doses monitored by confocal fluorescence microscopy.

|         |             |           |            |            |            |
|---------|-------------|-----------|------------|------------|------------|
| Control | 2.5 $\mu$ M | 5 $\mu$ M | 10 $\mu$ M | 20 $\mu$ M | 50 $\mu$ M |
| Control | 2.5 $\mu$ M | 5 $\mu$ M | 10 $\mu$ M | 20 $\mu$ M | 50 $\mu$ M |
| Control | 2.5 $\mu$ M | 5 $\mu$ M | 10 $\mu$ M | 20 $\mu$ M | 50 $\mu$ M |

Green: EPZ-6438, Blue: EED226, Red: EPZ-6438 + EED226 (“E/E”), 1:1

**AL3.** Cell proliferation assay for A549 cells after hMATE1 (*SLC47A1*) knockdown.

|   | 1   | 2       | 3   | 4       | 5   | 6     | 7   |
|---|-----|---------|-----|---------|-----|-------|-----|
| A | PBS | PBS     | PBS | PBS     | PBS | PBS   | PBS |
| B | PBS | Comp. 1 |     | Comp. 1 |     | blank | PBS |
| C | PBS |         |     |         |     |       | PBS |
| D | PBS |         |     |         |     |       | PBS |
| E | PBS | PBS     | PBS | PBS     | PBS | PBS   | PBS |

**Assembly:** Add 20  $\mu$ L Opti-Mem into wells B2-5, C2-6, and D2-5. Add 23.2  $\mu$ L of Opti-Mem into wells B6, C6, D6. Then add siRNA to B2-3, C2-3, and D2-3. Add scrambled RNA to B4-5, C4-5, and D4-5. Add diluted lipofectamine (siRNA:lipo 6:1) to B2-5, C2-5, and D2-5. Transfer cells to B2-5, C2-5, and D2-5 at a density of 5000 cells/well. Add same amount of medium into well B6-D6 as blank control. Add PBS into the outermost wells to prevent evaporation of transfection reactions. B2, C2, and D2 are siRNA

+ compound **1**; B3, C3, and D3 are siRNA only; B4, C4, and D4 are scrambled RNA + compound **1**; B5, C5, and D5 are scrambled RNA only; B6, C6, and D6 are blanks.

**AL4.** Cell proliferation assay for HCT-116 cells after exposure to epigenetic drugs.

|   | 1   | 2       | 3         | 4          | 5       | 6       | 7         | 8         | 9          | 10         | 11  |
|---|-----|---------|-----------|------------|---------|---------|-----------|-----------|------------|------------|-----|
| A | PBS | PBS     | PBS       | PBS        | PBS     | PBS     | PBS       | PBS       | PBS        | PBS        | PBS |
| B | PBS | No drug | 1 $\mu$ M | 10 $\mu$ M | No drug | No drug | 1 $\mu$ M | 1 $\mu$ M | 10 $\mu$ M | 10 $\mu$ M | PBS |
| C | PBS | ↓       | ↓         | ↓          | ↓       | ↓       | ↓         | ↓         | ↓          | ↓          | PBS |
| D | PBS | ↓       | ↓         | ↓          | ↓       | ↓       | ↓         | ↓         | ↓          | ↓          | PBS |
| E | PBS |         |           |            |         |         |           |           |            |            | PBS |
| F | PBS |         |           |            |         |         |           |           |            |            | PBS |
| G | PBS |         |           |            |         |         |           |           |            |            | PBS |
| H | PBS | PBS     | PBS       | PBS        | PBS     | PBS     | PBS       | PBS       | PBS        | PBS        | PBS |

**Assembly:** Add EED-226 and EPZ-6438 (“E/E”) to the cells in wells B5-G5, B7-G7, and B9-G9 to produce a final concentration of 2.5  $\mu$ M, and to wells B6-G6, B8-G8, and B10-G10 to a final concentration of 5  $\mu$ M. Incubate for a total of 72 hours and replace medium with fresh epi-drug(s) every 24 hours. Replace epi-drug after 72 hours with compound **1** at a final concentration of 1  $\mu$ M in wells B3-G3, B7-G7, and B8-G8, and 10  $\mu$ M in wells B4-G4, B9-G9, and B10-G10. Yellow columns: 2.5  $\mu$ M E/E; Blue columns: 5  $\mu$ M E/E. Column 2 is a no-treatment control, columns 3 and 4 are no-sensitization controls.

## Experimental Details for Assays

### Assays and sample preparation for confocal microscopy analysis

For transporter inhibition assays, cells were seeded into 35-mm poly-D-lysine-coated glass bottom dishes (MatTek Corporation, Ashland, MA, USA) at a density of  $10^5$  cells/mL in 2 mL of medium per dish. Cells were allowed to attach overnight prior to pre-treatment with 10  $\mu$ M pyrimethamine or vehicle for 20 minutes and subsequent treatment with 10  $\mu$ M compound **1** for 4 hours. Medium was removed and dishes were washed 3 times with 1 mL of pre-warmed PBS buffer. Cells were then fixed with 4% formaldehyde in PBS (Thermo Fisher) for 15 minutes at room temperature and washed an additional 3 times with PBS before imaging. The fluorescence of acridine was excited with a 405 nm (15 mW) laser at 4.4% and collected between 405-481 nm. The intensity of acridine-related fluorescence in treated cells was estimated by drawing a region of interest (ROI) around each cell, with the bright-field images assisting in identifying the cell perimeter. Signal intensities are averages from all pixels in the ROI minus the background fluorescence. A total of more than 100 individual cells across 4 views of 2 independent experiments were analyzed in this fashion. Automated quantification of fluorescence intensities was also performed using CellProfiler 3.0<sup>3</sup> with similar results (data not shown).

For RNAi knockdown of hMATE1 (*SLC47A1*) in imaging assays, A549 cells were harvested from T-75 cell culture flasks and seeded on a 6-well plate at a density of 150,000 cells per well. Silencer Select siRNA1, Silencer Select siRNA2, and scrambled siRNA (Silencer Select Negative Control #1) were thoroughly mixed with RNAiMAX in Opti-Mem media according to manufacturer's protocol and added to each well. Cells transfected at a final siRNA concentration of 20 nM for 48 hours at 37 °C were detached with trypsin and subcultured at a 1:2 ratio into 35 mm MatTek plates and allowed to attach overnight. Cell culture medium was replaced and supplemented with 10  $\mu$ M compound **1**, and dishes were incubated for 4 hours at 37 °C. Cells were fixed with 4% formaldehyde, permeabilized with 0.5% Triton X-100, washed with PBS, incubated with 7.5% BSA for 30 minutes at room temperature, and incubated with appropriately diluted primary antibody in 1% BSA for 1 hour at room temperature. After the cells were washed with PBS, they were incubated with the secondary antibody (Goat-anti-Rabbit IgG Alexa Fluor-635), diluted in 1% BSA (1:400 anti-rabbit) for 1 hour at 37 °C. After three PBS washes, samples were imaged immediately or stored in PBS at 4 °C for further testing.

For sensitization assays, HCT-116 cells were harvested from T-75 flasks, seeded on a 24-well plate with glass-like polymer bottom (P24-1.5P, Cellvis, Sunnyvale, CA) with 25,000 cells per well, and allowed to attach overnight. Single drugs or drug combinations were tested in this assay at final concentrations of 2.5  $\mu$ M EED226, 2.5  $\mu$ M EPZ-6438, 500  $\mu$ M valproic acid, and 10  $\mu$ M decitabine (see



assay layout 1, **AL1**, in the SI). Cells were incubated at 37 °C for 72 hours. Each well was replaced with fresh medium supplemented with 10 µM compound **1**, and incubation was continued for 4 additional hours. Each well was washed with 3 times with warm PBS, before cells were fixed with 0.5 mL of 4% formaldehyde at room temperature for 15 minutes. After 3 PBS washes, plates were immediately imaged or stored at 4 °C until analyzed. Subsequent incubations of HCT-116 cells at escalating doses of EED226 and EPZ-6438 were performed analogously (see **AL2** in the SI). Representative conditions that were screened for expression levels of hMATE1 were determined by immunofluorescence with anti-hMATE1 antibody as described in RNAi knockdown experiments.

### **Assays and sample preparation for ICP-MS analysis**

For transporter inhibition assays, 700,000 A549 cells in 2.5 mL of F12K media (ATCC 30-2004), supplemented with 10% FBS, and 10% penstrep, and 10% L-glutamine (Thermo Fisher, 25030-081), were seeded into T-25 flasks and allowed to attach overnight. Cells pre-treated with 100 nM pyrimethamine for 25 minutes and untreated cells were then dosed with 100 nM compound **1** for 3 hours. After treatment, medium was aspirated, and cells were washed 3 times with fresh media. Trypsin was added to detach cells, and 3 mL of fresh media were added to each flask to collect the cell suspensions, which were pelleted by centrifugation at 250 × g for 3 minutes. After the supernatant was aspirated, pellets were washed with 3 mL of PBS solution twice and centrifuged again at 250 × g for 3 minutes. Pellets were stored at -80 °C until analyzed by ICP-MS. The assay was performed in triplicate for each treatment group.

For uptake studies after hMATE1 (*SLC47A1*) knockdown, A549 cells were reverse-transfected with Silencer Select siRNA1 or Silencer Select Negative Control #1 scrambled RNA for 48 hours using the RNAiMAX system in Opti-Mem media. Media was replaced with fresh antibiotics-free DMEM/F12K medium and incubation was continued for an additional 24 hours. Cells were then incubated with 100 nM compound **1** at 37 °C for 4 hours, and cell pellets were prepared as described above. The assay was performed in triplicate for each treatment group. Microwave digestions and ICP-MS analysis for Pt were performed as described above.

### **Assays and sample preparation for cell viability screening**

In pyrimethamine competition assays, A549 cells were seeded at a density of 5000 cells per well and allowed to attach for 24 hours. Cells were then pre-treated with 10 or 100 nM pyrimethamine for 20

minutes and subsequently incubated with 100 nM compound **1** or DMF-containing media (control) for 72 hours. No-treatment controls were also included. Assays were run in duplicate with 6 replicates per plate. Cell viability was assessed as described above.

Cell viability in RNAi knockdown assays was assessed by transfecting A549 cells on 96-well plates using a reverse transfection protocol. Briefly, Silencer siRNA, scrambled RNA (Silencer Negative Control #3 siRNA), and lipofectamine (RNAiMAX) were diluted with Opti-Mem prior to mixing in each well to generate a final siRNA concentration of 10 nM. Mixtures were incubated for 20 minutes at room temperature. Cells were then seeded into new wells in DMEM/F12 medium without antibiotics at a density of 5000 cells/well, incubated in the presence of transfection reagent for 24 hours at 37 °C in 5% CO<sub>2</sub>, and finally treated with compound **1** at fixed concentrations of 100 nM or 1 μM (or DMF-containing media in control groups) for an additional 24 or 48 hours. Cell viability after 48 and 72 hours was assessed as described above.

In HCT-116 sensitization experiments, cells were seeded at a density of 1100 cells/well in 100 μL of media and allowed to attach overnight. Medium in each well was replaced with fresh medium containing a combination of EED226 and EPZ-6438 to generate final concentrations of 2.5 and 5 μM of each drug. Medium supplemented with epigenetic drugs was replaced every 24 hours and finally removed after 72 hours to begin treatment with compound **1** at concentrations of 1 μM and 10 μM for an additional 72 hours. Cell viability after 72 hours was assessed as described above.

## SI References

- 1 Ikediobi, O. N. *et al.* Mutation analysis of 24 known cancer genes in the NCI-60 cell line set. *Mol. Cancer Ther.* **5**, 2606-2612 (2006).
- 2 Leroy, B. *et al.* Analysis of TP53 mutation status in human cancer cell lines: a reassessment. *Hum. Mutat.* **35**, 756-765 (2014).
- 3 McQuin, C. *et al.* CellProfiler 3.0: Next-generation image processing for biology. *PLoS Biol.* **16**, e2005970 (2018).
